# Supplementary material for: Predicting Anticancer Drug Responses Using a Dual-Layer Integrated Cell Line-Drug Network Model
Source: PLoS Comput Biol. 2015 Sep 29;11(9):e1004498. doi: 10.1371/journal.pcbi.1004498 (PMC4587957; doi:10.1371/journal.pcbi.1004498)
Supplement: S1 Table — (XLS) [file pcbi.1004498.s010.xls]

## Sheet: Summary
Supplementary Table 1
Descriptor type	Number	Descriptor	Reference
Acidic group count	1	nAcid
ALOGP	3	ALogP, ALogp2, AMR	Ghose, A.K. and Crippen, G.M. , Atomic physicochemical parameters for three-dimensional structure-directed quantitative structure-activity relationships. I. Partition coefficients as a measure of hydrophobicity, Journal of Computational Chemistry, 1986, 7:565-577; Ghose, A.K. and Crippen, G.M. , Atomic physicochemical parameters for three-dimensional-structure-directed quantitative structure-acti…
APol	1	apol
Aromatic atoms count	1	naAromAtom
Aromatic bonds count	1	nAromBond
Atom count	14	nAtom, nHeavyAtom, nH, nB, nC, nN, nO, nS, nP, nF, nCl, nBr, nI, nX
Autocorrelation	346	ATS0m, ATS1m, ATS2m, ATS3m, ATS4m, ATS5m, ATS6m, ATS7m, ATS8m, ATS0v, ATS1v, ATS2v, ATS3v, ATS4v, ATS5v, ATS6v, ATS7v, ATS8v, ATS0e, ATS1e, ATS2e, ATS3e, ATS4e, ATS5e, ATS6e, ATS7e, ATS8e, ATS0p, ATS1p, ATS2p, ATS3p, ATS4p, ATS5p, ATS6p, ATS7p, ATS8p, ATS0i, ATS1i, ATS2i, ATS3i, ATS4i, ATS5i, ATS6i, ATS7i, ATS8i, ATS0s, ATS1s, ATS2s, ATS3s, ATS4s, ATS5s, ATS6s, ATS7s, ATS8s, AATS0m, AATS1m, AATS2…	Todeschini, R. and Consonni, V. (2009). Molecular descriptors for chemoinformatics, (Weinheim: Wiley VCH) pg 27-37
Barysz matrix	91	SpAbs_DzZ, SpMax_DzZ, SpDiam_DzZ, SpAD_DzZ, SpMAD_DzZ, EE_DzZ, SM1_DzZ, VE1_DzZ, VE2_DzZ, VE3_DzZ, VR1_DzZ, VR2_DzZ, VR3_DzZ, SpAbs_Dzm, SpMax_Dzm, SpDiam_Dzm, SpAD_Dzm, SpMAD_Dzm, EE_Dzm, SM1_Dzm, VE1_Dzm, VE2_Dzm, VE3_Dzm, VR1_Dzm, VR2_Dzm, VR3_Dzm, SpAbs_Dzv, SpMax_Dzv, SpDiam_Dzv, SpAD_Dzv, SpMAD_Dzv, EE_Dzv, SM1_Dzv, VE1_Dzv, VE2_Dzv, VE3_Dzv, VR1_Dzv, VR2_Dzv, VR3_Dzv, SpAbs_Dze, SpMax_Dze,…	Todeschini, R. and Consonni, V. (2009). Molecular descriptors for chemoinformatics, (Weinheim: Wiley VCH) pg 714-726
Basic group count	1	nBase
BCUT	6	BCUTw-1l, BCUTw-1h, BCUTc-1l, BCUTc-1h, BCUTp-1l, BCUTp-1h	Pearlman, R.S. and Smith, K.M., Metric Validation and the Receptor-Relevant Subspace Concept, J. Chem. Inf. Comput. Sci., 1999, 39:28-35; Burden, F.R., Molecular identification number for substructure searches , J. Chem. Inf. Comput. Sci., 1989, 29:225-227; Burden, F.R., Chemically Intuitive Molecular Index, Quant. Struct .-Act. Relat., 1997, 16:309-314; Kang, Y.K. and Jhon, M.S., Additivity of A…
Bond count	10	nBonds, nBonds2, nBondsS, nBondsS2, nBondsS3, nBondsD, nBondsD2, nBondsT, nBondsQ, nBondsM
BPol	1	bpol
Burden modified eigenvalues	96	SpMax1_Bhm, SpMax2_Bhm, SpMax3_Bhm, SpMax4_Bhm, SpMax5_Bhm, SpMax6_Bhm, SpMax7_Bhm, SpMax8_Bhm, SpMin1_Bhm, SpMin2_Bhm, SpMin3_Bhm, SpMin4_Bhm, SpMin5_Bhm, SpMin6_Bhm, SpMin7_Bhm, SpMin8_Bhm, SpMax1_Bhv, SpMax2_Bhv, SpMax3_Bhv, SpMax4_Bhv, SpMax5_Bhv, SpMax6_Bhv, SpMax7_Bhv, SpMax8_Bhv, SpMin1_Bhv, SpMin2_Bhv, SpMin3_Bhv, SpMin4_Bhv, SpMin5_Bhv, SpMin6_Bhv, SpMin7_Bhv, SpMin8_Bhv, SpMax1_Bhe, SpM…	Todeschini, R. and Consonni, V. (2009). Molecular descriptors for chemoinformatics, (Weinheim: Wiley VCH) pg 714-726
Carbon types	9	C1SP1, C2SP1, C1SP2, C2SP2, C3SP2, C1SP3, C2SP3, C3SP3, C4SP3
Chi chain	10	SCH-3, SCH-4, SCH-5, SCH-6, SCH-7, VCH-3, VCH-4, VCH-5, VCH-6, VCH-7	Kier, L. B., and Hall, L. H. (1976). Molecular connectivity in chemistry and drug research, (New York: Academic Press).
Chi cluster	8	SC-3, SC-4, SC-5, SC-6, VC-3, VC-4, VC-5, VC-6	Kier, L. B., and Hall, L. H. (1976). Molecular connectivity in chemistry and drug research, (New York: Academic Press).
Chi path cluster	6	SPC-4, SPC-5, SPC-6, VPC-4, VPC-5, VPC-6	Kier, L. B., and Hall, L. H. (1976). Molecular connectivity in chemistry and drug research, (New York: Academic Press).
Chi path	32	SP-0, SP-1, SP-2, SP-3, SP-4, SP-5, SP-6, SP-7, ASP-0, ASP-1, ASP-2, ASP-3, ASP-4, ASP-5, ASP-6, ASP-7, VP-0, VP-1, VP-2, VP-3, VP-4, VP-5, VP-6, VP-7, AVP-0, AVP-1, AVP-2, AVP-3, AVP-4, AVP-5, AVP-6, AVP-7	Kier, L. B., and Hall, L. H. (1976). Molecular connectivity in chemistry and drug research, (New York: Academic Press).
Constitutional	12	Sv, Sse, Spe, Sare, Sp, Si, Mv, Mse, Mpe, Mare, Mp, Mi
Crippen logP and MR	2	CrippenLogP, CrippenMR	Wildman, S. A., and Crippen, G. M. (1999). Prediction of Physicochemical Parameters by Atomic Contributions. J Chem Inf Comput Sci 39, 868-873.
Detour matrix	11	SpMax_Dt, SpDiam_Dt, SpAD_Dt, SpMAD_Dt, EE_Dt, VE1_Dt, VE2_Dt, VE3_Dt, VR1_Dt, VR2_Dt, VR3_Dt	Todeschini, R. and Consonni, V. (2009). Molecular descriptors for chemoinformatics, (Weinheim: Wiley VCH) pg 714-726
Eccentric connectivity index	1	ECCEN	Sharma, V. and Goswami, R. and Madan, A.K. , Eccentric Connectivity Index: A Novel Highly Discriminating Topological Descriptor for Structure-Property and Structure-Activity Studies , Journal of Chemical Information and Computer Sciences, 1997, 37:273-282
Atom type electrotopological state	489	nHBd, nwHBd, nHBa, nwHBa, nHBint2, nHBint3, nHBint4, nHBint5, nHBint6, nHBint7, nHBint8, nHBint9, nHBint10, nHsOH, nHdNH, nHsSH, nHsNH2, nHssNH, nHaaNH, nHsNH3p, nHssNH2p, nHsssNHp, nHtCH, nHdCH2, nHdsCH, nHaaCH, nHCHnX, nHCsats, nHCsatu, nHAvin, nHother, nHmisc, nsLi, nssBe, nssssBem, nsBH2, nssBH, nsssB, nssssBm, nsCH3, ndCH2, nssCH2, ntCH, ndsCH, naaCH, nsssCH, nddC, ntsC, ndssC, naasC, naaaC,…	Hall, L. H., and Kier, L. B. (1995). Electrotopological state indices for atom types: A novel combination of electronic, topological, and valence state information. J Chem Inf Comput Sci 35, 1039-1045; Liu, R., Sun, H., and So, S. S. (2001). Development of quantitative structure-property relationship models for early ADME evaluation in drug discovery. 2. Blood-brain barrier penetration. J Chem In…
Extended topochemical atom	43	ETA_Alpha, ETA_AlphaP, ETA_dAlpha_A, ETA_dAlpha_B, ETA_Epsilon_1, ETA_Epsilon_2, ETA_Epsilon_3, ETA_Epsilon_4, ETA_Epsilon_5, ETA_dEpsilon_A, ETA_dEpsilon_B, ETA_dEpsilon_C, ETA_dEpsilon_D, ETA_Psi_1, ETA_dPsi_A, ETA_dPsi_B, ETA_Shape_P, ETA_Shape_Y, ETA_Shape_X, ETA_Beta, ETA_BetaP, ETA_Beta_s, ETA_BetaP_s, ETA_Beta_ns, ETA_BetaP_ns, ETA_dBeta, ETA_dBetaP, ETA_Beta_ns_d, ETA_BetaP_ns_d, ETA_Eta,…	Roy K & Ghosh G, QSTR with Extended Topochemical Atom Indices. 2. Fish Toxicity of Substituted Benzenes. J. Chem. Inf. Comput. Sci., 44, 2004, 559-567. http://dx.doi.org/10.1021/ci0342066; Roy K, Das R N, On some novel extended topochemical atom (ETA) parameters for effective encoding of chemical information and modeling of fundamental physicochemical properties. SAR QSAR Environ Res 22, 2011, 45…
FMFDescriptor	1	FMF	Yang, Y. and Chen, H. and Nilsson, I. and Muresan, S. and Engkvist, O., Investigation of the Relationship between Topology and Selectivity for Druglike Molecules, J. Med. Chem., 2010, 53: 7709-7714
Fragment complexity	1	fragC	Nilakantan, R. and Nunn, D.S. and Greenblatt, L. and Walker, G. and Haraki, K. and Mobilio, D., A family of ring system-based structural fragments for use in structure-activity studies: database mining and recursive partitioning., Journal of chemical information and modeling, 2006, 46:1069-1077
Hbond acceptor count	4	nHBAcc, nHBAcc2, nHBAcc3, nHBAcc_Lipinski
Hbond donor count	2	nHBDon, nHBDon_Lipinski
Hybridization ratio	1	HybRatio
Information content	42	IC0, IC1, IC2, IC3, IC4, IC5, TIC0, TIC1, TIC2, TIC3, TIC4, TIC5, SIC0, SIC1, SIC2, SIC3, SIC4, SIC5, CIC0, CIC1, CIC2, CIC3, CIC4, CIC5, BIC0, BIC1, BIC2, BIC3, BIC4, BIC5, MIC0, MIC1, MIC2, MIC3, MIC4, MIC5, ZMIC0, ZMIC1, ZMIC2, ZMIC3, ZMIC4, ZMIC5	Todeschini, R. and Consonni, V. (2009). Molecular descriptors for chemoinformatics, (Weinheim: Wiley VCH) pg 408-411.
Kappa shape indices	3	Kier1, Kier2, Kier3	Hall, L. H., and Kier, L. B. (1991). The molecular connectivity chi indices and kappa shape indices in structure-property modeling. In Reviews of Computational Chemistry, K.B. Lipkowitz, and D.B. Boyd, eds. (New York: VCH publishers), pp. 367-412.
Largest chain	1	nAtomLC
Largest Pi system	1	nAtomP
Longest aliphatic chain	1	nAtomLAC
Mannhold LogP	1	MLogP	Mannhold, R. and Poda, G.I. and Ostermann, C. and Tetko, I.V., Calculation of molecular lipophilicity: State-of-the-art and comparison of log P methods on more than 96,000 compounds, J.Pharm.Sci., 2009, 98:861-893
McGowan volume	1	McGowan_Volume	Abraham MH, McGowan JC. The use of characteristic volumes to measure cavity terms in reversed phase liquid chromatography. Chromatographia. 1987;23:243-6.
Molecular distance edge	19	MDEC-11, MDEC-12, MDEC-13, MDEC-14, MDEC-22, MDEC-23, MDEC-24, MDEC-33, MDEC-34, MDEC-44, MDEO-11, MDEO-12, MDEO-22, MDEN-11, MDEN-12, MDEN-13, MDEN-22, MDEN-23, MDEN-33	Liu, S. and Cao, C. and Li, Z. , Approach to Estimation and Prediction for Normal Boiling Point (NBP) of Alkanes Based on a Novel Molecular Distance Edge (MDE) Vector, lambda, Journal of Chemical Information and Computer Sciences, 1998, 38:387-394
Molecular linear free energy relation	6	MLFER_A, MLFER_BH, MLFER_BO, MLFER_S, MLFER_E, MLFER_L	Platts JA, Butina D, Abraham MH, Hersey A. Estimation of molecular free energy relation descriptors using a group contribution approach. J Chem Inf Comput Sci. 1999;39(5):835-45.
Path counts	22	MPC2, MPC3, MPC4, MPC5, MPC6, MPC7, MPC8, MPC9, MPC10, TPC, piPC1, piPC2, piPC3, piPC4, piPC5, piPC6, piPC7, piPC8, piPC9, piPC10, TpiPC, R_TpiPCTPC	Todeschini, R. and Consonni, V. (2009). Molecular descriptors for chemoinformatics, (Weinheim: Wiley VCH) pg 574-579, pg 395-402
Petitjean number	1	PetitjeanNumber
Ring count	68	nRing, n3Ring, n4Ring, n5Ring, n6Ring, n7Ring, n8Ring, n9Ring, n10Ring, n11Ring, n12Ring, nG12Ring, nFRing, nF4Ring, nF5Ring, nF6Ring, nF7Ring, nF8Ring, nF9Ring, nF10Ring, nF11Ring, nF12Ring, nFG12Ring, nHeteroRing, n3HeteroRing, n4HeteroRing, n5HeteroRing, n6HeteroRing, n7HeteroRing, n8HeteroRing, n9HeteroRing, n10HeteroRing, n11HeteroRing, n12HeteroRing, nG12HeteroRing, nFHeteroRing, nF4HeteroR…
Rotatable bonds count	4	nRotB, RotBFrac, nRotBt, RotBtFrac
Rule of five	1	LipinskiFailures
Topological	3	topoRadius, topoDiameter, topoShape
Topological charge	21	GGI1, GGI2, GGI3, GGI4, GGI5, GGI6, GGI7, GGI8, GGI9, GGI10, JGI1, JGI2, JGI3, JGI4, JGI5, JGI6, JGI7, JGI8, JGI9, JGI10, JGT	Todeschini, R. and Consonni, V. (2009). Molecular descriptors for chemoinformatics, (Weinheim: Wiley VCH) pg 809-812
Topological distance matrix	11	SpMax_D, SpDiam_D, SpAD_D, SpMAD_D, EE_D, VE1_D, VE2_D, VE3_D, VR1_D, VR2_D, VR3_D	Todeschini, R. and Consonni, V. (2009). Molecular descriptors for chemoinformatics, (Weinheim: Wiley VCH) pg 714-726
Topological polar surface area	1	TopoPSA	Ertl, P. and Rohde, B. and Selzer, P., Fast Calculation of Molecular Polar Surface Area as a Sum of Fragment-Based Contributions and Its Application to the Prediction of Drug Transport Properties, J. Med. Chem., 2000, 43:3714-3717
Van der Waals volume	1	VABC
Vertex adjacency information (magnitude)	1	vAdjMat
Walk counts	20	MWC2, MWC3, MWC4, MWC5, MWC6, MWC7, MWC8, MWC9, MWC10, TWC, SRW2, SRW3, SRW4, SRW5, SRW6, SRW7, SRW8, SRW9, SRW10, TSRW	Todeschini, R. and Consonni, V. (2009). Molecular descriptors for chemoinformatics, (Weinheim: Wiley VCH) pg 875-882, pg 678-681
Weight	2	MW, AMW
Weighted path	5	WTPT-1, WTPT-2, WTPT-3, WTPT-4, WTPT-5	Randic, M. , On molecular identification numbers , Journal of Chemical Information and Computer Science, 1984, 24:164-175
Wiener numbers	2	WPATH, WPOL	Wiener, Harry, Structural Determination of Paraffin Boiling Points, Journal of the American Chemical Society, 1947, 69:17-20
XLogP	1	XLogP	Wang, R., Fu, Y., and Lai, L., A New Atom-Additive Method for Calculating Partition Coefficients, Journal of Chemical Information and Computer Sciences, 1997, 37:615-621; Wang, R., Gao, Y., and Lai, L., Calculating partition coefficient by atom-additive method, Perspectives in Drug Discovery and Design, 2000, 19:47-66
Zagreb index	1	Zagreb

## Sheet: Detailed
Descriptor Java Class	Descriptor	Description
AcidicGroupCountDescriptor	nAcid	Number of acidic groups. The list of acidic groups is defined by these SMARTS "$([O;H1]-[C,S,P]=O)", "$([*;-;!$(*~[*;+])])", "$([NH](S(=O)=O)C(F)(F)F)", and "$(n1nnnc1)" originally presented in JOELib
ALOGPDescriptor	ALogP	Ghose-Crippen LogKow
	ALogP2	Square of ALogP
	AMR	Molar refractivity
APolDescriptor	apol	Sum of the atomic polarizabilities (including implicit hydrogens)
AromaticAtomsCountDescriptor	naAromAtom	Number of aromatic atoms
AromaticBondsCountDescriptor	nAromBond	Number of aromatic bonds
AtomCountDescriptor	nAtom	Number of atoms
	nHeavyAtom	Number of heavy atoms (i.e. not hydrogen)
	nH	Number of hydrogen atoms
	nB	Number of boron atoms
	nC	Number of carbon atoms
	nN	Number of nitrogen atoms
	nO	Number of oxygen atoms
	nS	Number of sulphur atoms
	nP	Number of phosphorus atoms
	nF	Number of fluorine atoms
	nCl	Number of chlorine atoms
	nBr	Number of bromine atoms
	nI	Number of iodine atoms
	nX	Number of halogen atoms (F, Cl, Br, I, At, Uus)
AutocorrelationDescriptor	ATS0m	Broto-Moreau autocorrelation - lag 0 / weighted by mass
	ATS1m	Broto-Moreau autocorrelation - lag 1 / weighted by mass
	ATS2m	Broto-Moreau autocorrelation - lag 2 / weighted by mass
	ATS3m	Broto-Moreau autocorrelation - lag 3 / weighted by mass
	ATS4m	Broto-Moreau autocorrelation - lag 4 / weighted by mass
	ATS5m	Broto-Moreau autocorrelation - lag 5 / weighted by mass
	ATS6m	Broto-Moreau autocorrelation - lag 6 / weighted by mass
	ATS7m	Broto-Moreau autocorrelation - lag 7 / weighted by mass
	ATS8m	Broto-Moreau autocorrelation - lag 8 / weighted by mass
	ATS0v	Broto-Moreau autocorrelation - lag 0 / weighted by van der Waals volumes
	ATS1v	Broto-Moreau autocorrelation - lag 1 / weighted by van der Waals volumes
	ATS2v	Broto-Moreau autocorrelation - lag 2 / weighted by van der Waals volumes
	ATS3v	Broto-Moreau autocorrelation - lag 3 / weighted by van der Waals volumes
	ATS4v	Broto-Moreau autocorrelation - lag 4 / weighted by van der Waals volumes
	ATS5v	Broto-Moreau autocorrelation - lag 5 / weighted by van der Waals volumes
	ATS6v	Broto-Moreau autocorrelation - lag 6 / weighted by van der Waals volumes
	ATS7v	Broto-Moreau autocorrelation - lag 7 / weighted by van der Waals volumes
	ATS8v	Broto-Moreau autocorrelation - lag 8 / weighted by van der Waals volumes
	ATS0e	Broto-Moreau autocorrelation - lag 0 / weighted by Sanderson electronegativities
	ATS1e	Broto-Moreau autocorrelation - lag 1 / weighted by Sanderson electronegativities
	ATS2e	Broto-Moreau autocorrelation - lag 2 / weighted by Sanderson electronegativities
	ATS3e	Broto-Moreau autocorrelation - lag 3 / weighted by Sanderson electronegativities
	ATS4e	Broto-Moreau autocorrelation - lag 4 / weighted by Sanderson electronegativities
	ATS5e	Broto-Moreau autocorrelation - lag 5 / weighted by Sanderson electronegativities
	ATS6e	Broto-Moreau autocorrelation - lag 6 / weighted by Sanderson electronegativities
	ATS7e	Broto-Moreau autocorrelation - lag 7 / weighted by Sanderson electronegativities
	ATS8e	Broto-Moreau autocorrelation - lag 8 / weighted by Sanderson electronegativities
	ATS0p	Broto-Moreau autocorrelation - lag 0 / weighted by polarizabilities
	ATS1p	Broto-Moreau autocorrelation - lag 1 / weighted by polarizabilities
	ATS2p	Broto-Moreau autocorrelation - lag 2 / weighted by polarizabilities
	ATS3p	Broto-Moreau autocorrelation - lag 3 / weighted by polarizabilities
	ATS4p	Broto-Moreau autocorrelation - lag 4 / weighted by polarizabilities
	ATS5p	Broto-Moreau autocorrelation - lag 5 / weighted by polarizabilities
	ATS6p	Broto-Moreau autocorrelation - lag 6 / weighted by polarizabilities
	ATS7p	Broto-Moreau autocorrelation - lag 7 / weighted by polarizabilities
	ATS8p	Broto-Moreau autocorrelation - lag 8 / weighted by polarizabilities
	ATS0i	Broto-Moreau autocorrelation - lag 0 / weighted by first ionization potential
	ATS1i	Broto-Moreau autocorrelation - lag 1 / weighted by first ionization potential
	ATS2i	Broto-Moreau autocorrelation - lag 2 / weighted by first ionization potential
	ATS3i	Broto-Moreau autocorrelation - lag 3 / weighted by first ionization potential
	ATS4i	Broto-Moreau autocorrelation - lag 4 / weighted by first ionization potential
	ATS5i	Broto-Moreau autocorrelation - lag 5 / weighted by first ionization potential
	ATS6i	Broto-Moreau autocorrelation - lag 6 / weighted by first ionization potential
	ATS7i	Broto-Moreau autocorrelation - lag 7 / weighted by first ionization potential
	ATS8i	Broto-Moreau autocorrelation - lag 8 / weighted by first ionization potential
	ATS0s	Broto-Moreau autocorrelation - lag 0 / weighted by I-state
	ATS1s	Broto-Moreau autocorrelation - lag 1 / weighted by I-state
	ATS2s	Broto-Moreau autocorrelation - lag 2 / weighted by I-state
	ATS3s	Broto-Moreau autocorrelation - lag 3 / weighted by I-state
	ATS4s	Broto-Moreau autocorrelation - lag 4 / weighted by I-state
	ATS5s	Broto-Moreau autocorrelation - lag 5 / weighted by I-state
	ATS6s	Broto-Moreau autocorrelation - lag 6 / weighted by I-state
	ATS7s	Broto-Moreau autocorrelation - lag 7 / weighted by I-state
	ATS8s	Broto-Moreau autocorrelation - lag 8 / weighted by I-state
	AATS0m	Average Broto-Moreau autocorrelation - lag 0 / weighted by mass
	AATS1m	Average Broto-Moreau autocorrelation - lag 1 / weighted by mass
	AATS2m	Average Broto-Moreau autocorrelation - lag 2 / weighted by mass
	AATS3m	Average Broto-Moreau autocorrelation - lag 3 / weighted by mass
	AATS4m	Average Broto-Moreau autocorrelation - lag 4 / weighted by mass
	AATS5m	Average Broto-Moreau autocorrelation - lag 5 / weighted by mass
	AATS6m	Average Broto-Moreau autocorrelation - lag 6 / weighted by mass
	AATS7m	Average Broto-Moreau autocorrelation - lag 7 / weighted by mass
	AATS8m	Average Broto-Moreau autocorrelation - lag 8 / weighted by mass
	AATS0v	Average Broto-Moreau autocorrelation - lag 0 / weighted by van der Waals volumes
	AATS1v	Average Broto-Moreau autocorrelation - lag 1 / weighted by van der Waals volumes
	AATS2v	Average Broto-Moreau autocorrelation - lag 2 / weighted by van der Waals volumes
	AATS3v	Average Broto-Moreau autocorrelation - lag 3 / weighted by van der Waals volumes
	AATS4v	Average Broto-Moreau autocorrelation - lag 4 / weighted by van der Waals volumes
	AATS5v	Average Broto-Moreau autocorrelation - lag 5 / weighted by van der Waals volumes
	AATS6v	Average Broto-Moreau autocorrelation - lag 6 / weighted by van der Waals volumes
	AATS7v	Average Broto-Moreau autocorrelation - lag 7 / weighted by van der Waals volumes
	AATS8v	Average Broto-Moreau autocorrelation - lag 8 / weighted by van der Waals volumes
	AATS0e	Average Broto-Moreau autocorrelation - lag 0 / weighted by Sanderson electronegativities
	AATS1e	Average Broto-Moreau autocorrelation - lag 1 / weighted by Sanderson electronegativities
	AATS2e	Average Broto-Moreau autocorrelation - lag 2 / weighted by Sanderson electronegativities
	AATS3e	Average Broto-Moreau autocorrelation - lag 3 / weighted by Sanderson electronegativities
	AATS4e	Average Broto-Moreau autocorrelation - lag 4 / weighted by Sanderson electronegativities
	AATS5e	Average Broto-Moreau autocorrelation - lag 5 / weighted by Sanderson electronegativities
	AATS6e	Average Broto-Moreau autocorrelation - lag 6 / weighted by Sanderson electronegativities
	AATS7e	Average Broto-Moreau autocorrelation - lag 7 / weighted by Sanderson electronegativities
	AATS8e	Average Broto-Moreau autocorrelation - lag 8 / weighted by Sanderson electronegativities
	AATS0p	Average Broto-Moreau autocorrelation - lag 0 / weighted by polarizabilities
	AATS1p	Average Broto-Moreau autocorrelation - lag 1 / weighted by polarizabilities
	AATS2p	Average Broto-Moreau autocorrelation - lag 2 / weighted by polarizabilities
	AATS3p	Average Broto-Moreau autocorrelation - lag 3 / weighted by polarizabilities
	AATS4p	Average Broto-Moreau autocorrelation - lag 4 / weighted by polarizabilities
	AATS5p	Average Broto-Moreau autocorrelation - lag 5 / weighted by polarizabilities
	AATS6p	Average Broto-Moreau autocorrelation - lag 6 / weighted by polarizabilities
	AATS7p	Average Broto-Moreau autocorrelation - lag 7 / weighted by polarizabilities
	AATS8p	Average Broto-Moreau autocorrelation - lag 8 / weighted by polarizabilities
	AATS0i	Average Broto-Moreau autocorrelation - lag 0 / weighted by first ionization potential
	AATS1i	Average Broto-Moreau autocorrelation - lag 1 / weighted by first ionization potential
	AATS2i	Average Broto-Moreau autocorrelation - lag 2 / weighted by first ionization potential
	AATS3i	Average Broto-Moreau autocorrelation - lag 3 / weighted by first ionization potential
	AATS4i	Average Broto-Moreau autocorrelation - lag 4 / weighted by first ionization potential
	AATS5i	Average Broto-Moreau autocorrelation - lag 5 / weighted by first ionization potential
	AATS6i	Average Broto-Moreau autocorrelation - lag 6 / weighted by first ionization potential
	AATS7i	Average Broto-Moreau autocorrelation - lag 7 / weighted by first ionization potential
	AATS8i	Average Broto-Moreau autocorrelation - lag 8 / weighted by first ionization potential
	AATS0s	Average Broto-Moreau autocorrelation - lag 0 / weighted by I-state
	AATS1s	Average Broto-Moreau autocorrelation - lag 1 / weighted by I-state
	AATS2s	Average Broto-Moreau autocorrelation - lag 2 / weighted by I-state
	AATS3s	Average Broto-Moreau autocorrelation - lag 3 / weighted by I-state
	AATS4s	Average Broto-Moreau autocorrelation - lag 4 / weighted by I-state
	AATS5s	Average Broto-Moreau autocorrelation - lag 5 / weighted by I-state
	AATS6s	Average Broto-Moreau autocorrelation - lag 6 / weighted by I-state
	AATS7s	Average Broto-Moreau autocorrelation - lag 7 / weighted by I-state
	AATS8s	Average Broto-Moreau autocorrelation - lag 8 / weighted by I-state
	ATSC0c	Centered Broto-Moreau autocorrelation - lag 0 / weighted by charges
	ATSC1c	Centered Broto-Moreau autocorrelation - lag 1 / weighted by charges
	ATSC2c	Centered Broto-Moreau autocorrelation - lag 2 / weighted by charges
	ATSC3c	Centered Broto-Moreau autocorrelation - lag 3 / weighted by charges
	ATSC4c	Centered Broto-Moreau autocorrelation - lag 4 / weighted by charges
	ATSC5c	Centered Broto-Moreau autocorrelation - lag 5 / weighted by charges
	ATSC6c	Centered Broto-Moreau autocorrelation - lag 6 / weighted by charges
	ATSC7c	Centered Broto-Moreau autocorrelation - lag 7 / weighted by charges
	ATSC8c	Centered Broto-Moreau autocorrelation - lag 8 / weighted by charges
	ATSC0m	Centered Broto-Moreau autocorrelation - lag 0 / weighted by mass
	ATSC1m	Centered Broto-Moreau autocorrelation - lag 1 / weighted by mass
	ATSC2m	Centered Broto-Moreau autocorrelation - lag 2 / weighted by mass
	ATSC3m	Centered Broto-Moreau autocorrelation - lag 3 / weighted by mass
	ATSC4m	Centered Broto-Moreau autocorrelation - lag 4 / weighted by mass
	ATSC5m	Centered Broto-Moreau autocorrelation - lag 5 / weighted by mass
	ATSC6m	Centered Broto-Moreau autocorrelation - lag 6 / weighted by mass
	ATSC7m	Centered Broto-Moreau autocorrelation - lag 7 / weighted by mass
	ATSC8m	Centered Broto-Moreau autocorrelation - lag 8 / weighted by mass
	ATSC0v	Centered Broto-Moreau autocorrelation - lag 0 / weighted by van der Waals volumes
	ATSC1v	Centered Broto-Moreau autocorrelation - lag 1 / weighted by van der Waals volumes
	ATSC2v	Centered Broto-Moreau autocorrelation - lag 2 / weighted by van der Waals volumes
	ATSC3v	Centered Broto-Moreau autocorrelation - lag 3 / weighted by van der Waals volumes
	ATSC4v	Centered Broto-Moreau autocorrelation - lag 4 / weighted by van der Waals volumes
	ATSC5v	Centered Broto-Moreau autocorrelation - lag 5 / weighted by van der Waals volumes
	ATSC6v	Centered Broto-Moreau autocorrelation - lag 6 / weighted by van der Waals volumes
	ATSC7v	Centered Broto-Moreau autocorrelation - lag 7 / weighted by van der Waals volumes
	ATSC8v	Centered Broto-Moreau autocorrelation - lag 8 / weighted by van der Waals volumes
	ATSC0e	Centered Broto-Moreau autocorrelation - lag 0 / weighted by Sanderson electronegativities
	ATSC1e	Centered Broto-Moreau autocorrelation - lag 1 / weighted by Sanderson electronegativities
	ATSC2e	Centered Broto-Moreau autocorrelation - lag 2 / weighted by Sanderson electronegativities
	ATSC3e	Centered Broto-Moreau autocorrelation - lag 3 / weighted by Sanderson electronegativities
	ATSC4e	Centered Broto-Moreau autocorrelation - lag 4 / weighted by Sanderson electronegativities
	ATSC5e	Centered Broto-Moreau autocorrelation - lag 5 / weighted by Sanderson electronegativities
	ATSC6e	Centered Broto-Moreau autocorrelation - lag 6 / weighted by Sanderson electronegativities
	ATSC7e	Centered Broto-Moreau autocorrelation - lag 7 / weighted by Sanderson electronegativities
	ATSC8e	Centered Broto-Moreau autocorrelation - lag 8 / weighted by Sanderson electronegativities
	ATSC0p	Centered Broto-Moreau autocorrelation - lag 0 / weighted by polarizabilities
	ATSC1p	Centered Broto-Moreau autocorrelation - lag 1 / weighted by polarizabilities
	ATSC2p	Centered Broto-Moreau autocorrelation - lag 2 / weighted by polarizabilities
	ATSC3p	Centered Broto-Moreau autocorrelation - lag 3 / weighted by polarizabilities
	ATSC4p	Centered Broto-Moreau autocorrelation - lag 4 / weighted by polarizabilities
	ATSC5p	Centered Broto-Moreau autocorrelation - lag 5 / weighted by polarizabilities
	ATSC6p	Centered Broto-Moreau autocorrelation - lag 6 / weighted by polarizabilities
	ATSC7p	Centered Broto-Moreau autocorrelation - lag 7 / weighted by polarizabilities
	ATSC8p	Centered Broto-Moreau autocorrelation - lag 8 / weighted by polarizabilities
	ATSC0i	Centered Broto-Moreau autocorrelation - lag 0 / weighted by first ionization potential
	ATSC1i	Centered Broto-Moreau autocorrelation - lag 1 / weighted by first ionization potential
	ATSC2i	Centered Broto-Moreau autocorrelation - lag 2 / weighted by first ionization potential
	ATSC3i	Centered Broto-Moreau autocorrelation - lag 3 / weighted by first ionization potential
	ATSC4i	Centered Broto-Moreau autocorrelation - lag 4 / weighted by first ionization potential
	ATSC5i	Centered Broto-Moreau autocorrelation - lag 5 / weighted by first ionization potential
	ATSC6i	Centered Broto-Moreau autocorrelation - lag 6 / weighted by first ionization potential
	ATSC7i	Centered Broto-Moreau autocorrelation - lag 7 / weighted by first ionization potential
	ATSC8i	Centered Broto-Moreau autocorrelation - lag 8 / weighted by first ionization potential
	ATSC0s	Centered Broto-Moreau autocorrelation - lag 0 / weighted by I-state
	ATSC1s	Centered Broto-Moreau autocorrelation - lag 1 / weighted by I-state
	ATSC2s	Centered Broto-Moreau autocorrelation - lag 2 / weighted by I-state
	ATSC3s	Centered Broto-Moreau autocorrelation - lag 3 / weighted by I-state
	ATSC4s	Centered Broto-Moreau autocorrelation - lag 4 / weighted by I-state
	ATSC5s	Centered Broto-Moreau autocorrelation - lag 5 / weighted by I-state
	ATSC6s	Centered Broto-Moreau autocorrelation - lag 6 / weighted by I-state
	ATSC7s	Centered Broto-Moreau autocorrelation - lag 7 / weighted by I-state
	ATSC8s	Centered Broto-Moreau autocorrelation - lag 8 / weighted by I-state
	AATSC0c	Average centered Broto-Moreau autocorrelation - lag 0 / weighted by charges
	AATSC1c	Average centered Broto-Moreau autocorrelation - lag 1 / weighted by charges
	AATSC2c	Average centered Broto-Moreau autocorrelation - lag 2 / weighted by charges
	AATSC3c	Average centered Broto-Moreau autocorrelation - lag 3 / weighted by charges
	AATSC4c	Average centered Broto-Moreau autocorrelation - lag 4 / weighted by charges
	AATSC5c	Average centered Broto-Moreau autocorrelation - lag 5 / weighted by charges
	AATSC6c	Average centered Broto-Moreau autocorrelation - lag 6 / weighted by charges
	AATSC7c	Average centered Broto-Moreau autocorrelation - lag 7 / weighted by charges
	AATSC8c	Average centered Broto-Moreau autocorrelation - lag 8 / weighted by charges
	AATSC0m	Average centered Broto-Moreau autocorrelation - lag 0 / weighted by mass
	AATSC1m	Average centered Broto-Moreau autocorrelation - lag 1 / weighted by mass
	AATSC2m	Average centered Broto-Moreau autocorrelation - lag 2 / weighted by mass
	AATSC3m	Average centered Broto-Moreau autocorrelation - lag 3 / weighted by mass
	AATSC4m	Average centered Broto-Moreau autocorrelation - lag 4 / weighted by mass
	AATSC5m	Average centered Broto-Moreau autocorrelation - lag 5 / weighted by mass
	AATSC6m	Average centered Broto-Moreau autocorrelation - lag 6 / weighted by mass
	AATSC7m	Average centered Broto-Moreau autocorrelation - lag 7 / weighted by mass
	AATSC8m	Average centered Broto-Moreau autocorrelation - lag 8 / weighted by mass
	AATSC0v	Average centered Broto-Moreau autocorrelation - lag 0 / weighted by van der Waals volumes
	AATSC1v	Average centered Broto-Moreau autocorrelation - lag 1 / weighted by van der Waals volumes
	AATSC2v	Average centered Broto-Moreau autocorrelation - lag 2 / weighted by van der Waals volumes
	AATSC3v	Average centered Broto-Moreau autocorrelation - lag 3 / weighted by van der Waals volumes
	AATSC4v	Average centered Broto-Moreau autocorrelation - lag 4 / weighted by van der Waals volumes
	AATSC5v	Average centered Broto-Moreau autocorrelation - lag 5 / weighted by van der Waals volumes
	AATSC6v	Average centered Broto-Moreau autocorrelation - lag 6 / weighted by van der Waals volumes
	AATSC7v	Average centered Broto-Moreau autocorrelation - lag 7 / weighted by van der Waals volumes
	AATSC8v	Average centered Broto-Moreau autocorrelation - lag 8 / weighted by van der Waals volumes
	AATSC0e	Average centered Broto-Moreau autocorrelation - lag 0 / weighted by Sanderson electronegativities
	AATSC1e	Average centered Broto-Moreau autocorrelation - lag 1 / weighted by Sanderson electronegativities
	AATSC2e	Average centered Broto-Moreau autocorrelation - lag 2 / weighted by Sanderson electronegativities
	AATSC3e	Average centered Broto-Moreau autocorrelation - lag 3 / weighted by Sanderson electronegativities
	AATSC4e	Average centered Broto-Moreau autocorrelation - lag 4 / weighted by Sanderson electronegativities
	AATSC5e	Average centered Broto-Moreau autocorrelation - lag 5 / weighted by Sanderson electronegativities
	AATSC6e	Average centered Broto-Moreau autocorrelation - lag 6 / weighted by Sanderson electronegativities
	AATSC7e	Average centered Broto-Moreau autocorrelation - lag 7 / weighted by Sanderson electronegativities
	AATSC8e	Average centered Broto-Moreau autocorrelation - lag 8 / weighted by Sanderson electronegativities
	AATSC0p	Average centered Broto-Moreau autocorrelation - lag 0 / weighted by polarizabilities
	AATSC1p	Average centered Broto-Moreau autocorrelation - lag 1 / weighted by polarizabilities
	AATSC2p	Average centered Broto-Moreau autocorrelation - lag 2 / weighted by polarizabilities
	AATSC3p	Average centered Broto-Moreau autocorrelation - lag 3 / weighted by polarizabilities
	AATSC4p	Average centered Broto-Moreau autocorrelation - lag 4 / weighted by polarizabilities
	AATSC5p	Average centered Broto-Moreau autocorrelation - lag 5 / weighted by polarizabilities
	AATSC6p	Average centered Broto-Moreau autocorrelation - lag 6 / weighted by polarizabilities
	AATSC7p	Average centered Broto-Moreau autocorrelation - lag 7 / weighted by polarizabilities
	AATSC8p	Average centered Broto-Moreau autocorrelation - lag 8 / weighted by polarizabilities
	AATSC0i	Average centered Broto-Moreau autocorrelation - lag 0 / weighted by first ionization potential
	AATSC1i	Average centered Broto-Moreau autocorrelation - lag 1 / weighted by first ionization potential
	AATSC2i	Average centered Broto-Moreau autocorrelation - lag 2 / weighted by first ionization potential
	AATSC3i	Average centered Broto-Moreau autocorrelation - lag 3 / weighted by first ionization potential
	AATSC4i	Average centered Broto-Moreau autocorrelation - lag 4 / weighted by first ionization potential
	AATSC5i	Average centered Broto-Moreau autocorrelation - lag 5 / weighted by first ionization potential
	AATSC6i	Average centered Broto-Moreau autocorrelation - lag 6 / weighted by first ionization potential
	AATSC7i	Average centered Broto-Moreau autocorrelation - lag 7 / weighted by first ionization potential
	AATSC8i	Average centered Broto-Moreau autocorrelation - lag 8 / weighted by first ionization potential
	AATSC0s	Average centered Broto-Moreau autocorrelation - lag 0 / weighted by I-state
	AATSC1s	Average centered Broto-Moreau autocorrelation - lag 1 / weighted by I-state
	AATSC2s	Average centered Broto-Moreau autocorrelation - lag 2 / weighted by I-state
	AATSC3s	Average centered Broto-Moreau autocorrelation - lag 3 / weighted by I-state
	AATSC4s	Average centered Broto-Moreau autocorrelation - lag 4 / weighted by I-state
	AATSC5s	Average centered Broto-Moreau autocorrelation - lag 5 / weighted by I-state
	AATSC6s	Average centered Broto-Moreau autocorrelation - lag 6 / weighted by I-state
	AATSC7s	Average centered Broto-Moreau autocorrelation - lag 7 / weighted by I-state
	AATSC8s	Average centered Broto-Moreau autocorrelation - lag 8 / weighted by I-state
	MATS1c	Moran autocorrelation - lag 1 / weighted by charges
	MATS2c	Moran autocorrelation - lag 2 / weighted by charges
	MATS3c	Moran autocorrelation - lag 3 / weighted by charges
	MATS4c	Moran autocorrelation - lag 4 / weighted by charges
	MATS5c	Moran autocorrelation - lag 5 / weighted by charges
	MATS6c	Moran autocorrelation - lag 6 / weighted by charges
	MATS7c	Moran autocorrelation - lag 7 / weighted by charges
	MATS8c	Moran autocorrelation - lag 8 / weighted by charges
	MATS1m	Moran autocorrelation - lag 1 / weighted by mass
	MATS2m	Moran autocorrelation - lag 2 / weighted by mass
	MATS3m	Moran autocorrelation - lag 3 / weighted by mass
	MATS4m	Moran autocorrelation - lag 4 / weighted by mass
	MATS5m	Moran autocorrelation - lag 5 / weighted by mass
	MATS6m	Moran autocorrelation - lag 6 / weighted by mass
	MATS7m	Moran autocorrelation - lag 7 / weighted by mass
	MATS8m	Moran autocorrelation - lag 8 / weighted by mass
	MATS1v	Moran autocorrelation - lag 1 / weighted by van der Waals volumes
	MATS2v	Moran autocorrelation - lag 2 / weighted by van der Waals volumes
	MATS3v	Moran autocorrelation - lag 3 / weighted by van der Waals volumes
	MATS4v	Moran autocorrelation - lag 4 / weighted by van der Waals volumes
	MATS5v	Moran autocorrelation - lag 5 / weighted by van der Waals volumes
	MATS6v	Moran autocorrelation - lag 6 / weighted by van der Waals volumes
	MATS7v	Moran autocorrelation - lag 7 / weighted by van der Waals volumes
	MATS8v	Moran autocorrelation - lag 8 / weighted by van der Waals volumes
	MATS1e	Moran autocorrelation - lag 1 / weighted by Sanderson electronegativities
	MATS2e	Moran autocorrelation - lag 2 / weighted by Sanderson electronegativities
	MATS3e	Moran autocorrelation - lag 3 / weighted by Sanderson electronegativities
	MATS4e	Moran autocorrelation - lag 4 / weighted by Sanderson electronegativities
	MATS5e	Moran autocorrelation - lag 5 / weighted by Sanderson electronegativities
	MATS6e	Moran autocorrelation - lag 6 / weighted by Sanderson electronegativities
	MATS7e	Moran autocorrelation - lag 7 / weighted by Sanderson electronegativities
	MATS8e	Moran autocorrelation - lag 8 / weighted by Sanderson electronegativities
	MATS1p	Moran autocorrelation - lag 1 / weighted by polarizabilities
	MATS2p	Moran autocorrelation - lag 2 / weighted by polarizabilities
	MATS3p	Moran autocorrelation - lag 3 / weighted by polarizabilities
	MATS4p	Moran autocorrelation - lag 4 / weighted by polarizabilities
	MATS5p	Moran autocorrelation - lag 5 / weighted by polarizabilities
	MATS6p	Moran autocorrelation - lag 6 / weighted by polarizabilities
	MATS7p	Moran autocorrelation - lag 7 / weighted by polarizabilities
	MATS8p	Moran autocorrelation - lag 8 / weighted by polarizabilities
	MATS1i	Moran autocorrelation - lag 1 / weighted by first ionization potential
	MATS2i	Moran autocorrelation - lag 2 / weighted by first ionization potential
	MATS3i	Moran autocorrelation - lag 3 / weighted by first ionization potential
	MATS4i	Moran autocorrelation - lag 4 / weighted by first ionization potential
	MATS5i	Moran autocorrelation - lag 5 / weighted by first ionization potential
	MATS6i	Moran autocorrelation - lag 6 / weighted by first ionization potential
	MATS7i	Moran autocorrelation - lag 7 / weighted by first ionization potential
	MATS8i	Moran autocorrelation - lag 8 / weighted by first ionization potential
	MATS1s	Moran autocorrelation - lag 1 / weighted by I-state
	MATS2s	Moran autocorrelation - lag 2 / weighted by I-state
	MATS3s	Moran autocorrelation - lag 3 / weighted by I-state
	MATS4s	Moran autocorrelation - lag 4 / weighted by I-state
	MATS5s	Moran autocorrelation - lag 5 / weighted by I-state
	MATS6s	Moran autocorrelation - lag 6 / weighted by I-state
	MATS7s	Moran autocorrelation - lag 7 / weighted by I-state
	MATS8s	Moran autocorrelation - lag 8 / weighted by I-state
	GATS1c	Geary autocorrelation - lag 1 / weighted by charges
	GATS2c	Geary autocorrelation - lag 2 / weighted by charges
	GATS3c	Geary autocorrelation - lag 3 / weighted by charges
	GATS4c	Geary autocorrelation - lag 4 / weighted by charges
	GATS5c	Geary autocorrelation - lag 5 / weighted by charges
	GATS6c	Geary autocorrelation - lag 6 / weighted by charges
	GATS7c	Geary autocorrelation - lag 7 / weighted by charges
	GATS8c	Geary autocorrelation - lag 8 / weighted by charges
	GATS1m	Geary autocorrelation - lag 1 / weighted by mass
	GATS2m	Geary autocorrelation - lag 2 / weighted by mass
	GATS3m	Geary autocorrelation - lag 3 / weighted by mass
	GATS4m	Geary autocorrelation - lag 4 / weighted by mass
	GATS5m	Geary autocorrelation - lag 5 / weighted by mass
	GATS6m	Geary autocorrelation - lag 6 / weighted by mass
	GATS7m	Geary autocorrelation - lag 7 / weighted by mass
	GATS8m	Geary autocorrelation - lag 8 / weighted by mass
	GATS1v	Geary autocorrelation - lag 1 / weighted by van der Waals volumes
	GATS2v	Geary autocorrelation - lag 2 / weighted by van der Waals volumes
	GATS3v	Geary autocorrelation - lag 3 / weighted by van der Waals volumes
	GATS4v	Geary autocorrelation - lag 4 / weighted by van der Waals volumes
	GATS5v	Geary autocorrelation - lag 5 / weighted by van der Waals volumes
	GATS6v	Geary autocorrelation - lag 6 / weighted by van der Waals volumes
	GATS7v	Geary autocorrelation - lag 7 / weighted by van der Waals volumes
	GATS8v	Geary autocorrelation - lag 8 / weighted by van der Waals volumes
	GATS1e	Geary autocorrelation - lag 1 / weighted by Sanderson electronegativities
	GATS2e	Geary autocorrelation - lag 2 / weighted by Sanderson electronegativities
	GATS3e	Geary autocorrelation - lag 3 / weighted by Sanderson electronegativities
	GATS4e	Geary autocorrelation - lag 4 / weighted by Sanderson electronegativities
	GATS5e	Geary autocorrelation - lag 5 / weighted by Sanderson electronegativities
	GATS6e	Geary autocorrelation - lag 6 / weighted by Sanderson electronegativities
	GATS7e	Geary autocorrelation - lag 7 / weighted by Sanderson electronegativities
	GATS8e	Geary autocorrelation - lag 8 / weighted by Sanderson electronegativities
	GATS1p	Geary autocorrelation - lag 1 / weighted by polarizabilities
	GATS2p	Geary autocorrelation - lag 2 / weighted by polarizabilities
	GATS3p	Geary autocorrelation - lag 3 / weighted by polarizabilities
	GATS4p	Geary autocorrelation - lag 4 / weighted by polarizabilities
	GATS5p	Geary autocorrelation - lag 5 / weighted by polarizabilities
	GATS6p	Geary autocorrelation - lag 6 / weighted by polarizabilities
	GATS7p	Geary autocorrelation - lag 7 / weighted by polarizabilities
	GATS8p	Geary autocorrelation - lag 8 / weighted by polarizabilities
	GATS1i	Geary autocorrelation - lag 1 / weighted by first ionization potential
	GATS2i	Geary autocorrelation - lag 2 / weighted by first ionization potential
	GATS3i	Geary autocorrelation - lag 3 / weighted by first ionization potential
	GATS4i	Geary autocorrelation - lag 4 / weighted by first ionization potential
	GATS5i	Geary autocorrelation - lag 5 / weighted by first ionization potential
	GATS6i	Geary autocorrelation - lag 6 / weighted by first ionization potential
	GATS7i	Geary autocorrelation - lag 7 / weighted by first ionization potential
	GATS8i	Geary autocorrelation - lag 8 / weighted by first ionization potential
	GATS1s	Geary autocorrelation - lag 1 / weighted by I-state
	GATS2s	Geary autocorrelation - lag 2 / weighted by I-state
	GATS3s	Geary autocorrelation - lag 3 / weighted by I-state
	GATS4s	Geary autocorrelation - lag 4 / weighted by I-state
	GATS5s	Geary autocorrelation - lag 5 / weighted by I-state
	GATS6s	Geary autocorrelation - lag 6 / weighted by I-state
	GATS7s	Geary autocorrelation - lag 7 / weighted by I-state
	GATS8s	Geary autocorrelation - lag 8 / weighted by I-state
BaryszMatrixDescriptor	SpAbs_DzZ	Graph energy from Barysz matrix / weighted by atomic number
	SpMax_DzZ	Leading eigenvalue from Barysz matrix / weighted by atomic number
	SpDiam_DzZ	Spectral diameter from Barysz matrix / weighted by atomic number
	SpAD_DzZ	Spectral absolute deviation from Barysz matrix / weighted by atomic number
	SpMAD_DzZ	Spectral mean absolute deviation from Barysz matrix / weighted by atomic number
	EE_DzZ	Estrada-like index from Barysz matrix / weighted by atomic number (ln(1+x))
	SM1_DzZ	Spectral moment of order 1 from Barysz matrix / weighted by atomic number
	VE1_DzZ	Coefficient sum of the last eigenvector from Barysz matrix / weighted by atomic number
	VE2_DzZ	Average coefficient sum of the last eigenvector from Barysz matrix / weighted by atomic number
	VE3_DzZ	Logarithmic coefficient sum of the last eigenvector from Barysz matrix / weighted by atomic number
	VR1_DzZ	Randic-like eigenvector-based index from Barysz matrix / weighted by atomic number
	VR2_DzZ	Normalized Randic-like eigenvector-based index from Barysz matrix / weighted by atomic number
	VR3_DzZ	Logarithmic Randic-like eigenvector-based index from Barysz matrix / weighted by atomic number
	SpAbs_Dzm	Graph energy from Barysz matrix / weighted by mass
	SpMax_Dzm	Leading eigenvalue from Barysz matrix / weighted by mass
	SpDiam_Dzm	Spectral diameter from Barysz matrix / weighted by mass
	SpAD_Dzm	Spectral absolute deviation from Barysz matrix / weighted by mass
	SpMAD_Dzm	Spectral mean absolute deviation from Barysz matrix / weighted by mass
	EE_Dzm	Estrada-like index from Barysz matrix / weighted by mass (ln(1+x))
	SM1_Dzm	Spectral moment of order 1 from Barysz matrix / weighted by mass
	VE1_Dzm	Coefficient sum of the last eigenvector from Barysz matrix / weighted by mass
	VE2_Dzm	Average coefficient sum of the last eigenvector from Barysz matrix / weighted by mass
	VE3_Dzm	Logarithmic coefficient sum of the last eigenvector from Barysz matrix / weighted by mass
	VR1_Dzm	Randic-like eigenvector-based index from Barysz matrix / weighted by mass
	VR2_Dzm	Normalized Randic-like eigenvector-based index from Barysz matrix / weighted by mass
	VR3_Dzm	Logarithmic Randic-like eigenvector-based index from Barysz matrix / weighted by mass
	SpAbs_Dzv	Graph energy from Barysz matrix / weighted by van der Waals volumes
	SpMax_Dzv	Leading eigenvalue from Barysz matrix / weighted by van der Waals volumes
	SpDiam_Dzv	Spectral diameter from Barysz matrix / weighted by van der Waals volumes
	SpAD_Dzv	Spectral absolute deviation from Barysz matrix / weighted by van der Waals volumes
	SpMAD_Dzv	Spectral mean absolute deviation from Barysz matrix / weighted by van der Waals volumes
	EE_Dzv	Estrada-like index from Barysz matrix / weighted by van der Waals volumes (ln(1+x))
	SM1_Dzv	Spectral moment of order 1 from Barysz matrix / weighted by van der Waals volumes
	VE1_Dzv	Coefficient sum of the last eigenvector from Barysz matrix / weighted by van der Waals volumes
	VE2_Dzv	Average coefficient sum of the last eigenvector from Barysz matrix / weighted by van der Waals volumes
	VE3_Dzv	Logarithmic coefficient sum of the last eigenvector from Barysz matrix / weighted by van der Waals volumes
	VR1_Dzv	Randic-like eigenvector-based index from Barysz matrix / weighted by van der Waals volumes
	VR2_Dzv	Normalized Randic-like eigenvector-based index from Barysz matrix / weighted by van der Waals volumes
	VR3_Dzv	Logarithmic Randic-like eigenvector-based index from Barysz matrix / weighted by van der Waals volumes
	SpAbs_Dze	Graph energy from Barysz matrix / weighted by Sanderson electronegativities
	SpMax_Dze	Leading eigenvalue from Barysz matrix / weighted by Sanderson electronegativities
	SpDiam_Dze	Spectral diameter from Barysz matrix / weighted by Sanderson electronegativities
	SpAD_Dze	Spectral absolute deviation from Barysz matrix / weighted by Sanderson electronegativities
	SpMAD_Dze	Spectral mean absolute deviation from Barysz matrix / weighted by Sanderson electronegativities
	EE_Dze	Estrada-like index from Barysz matrix / weighted by Sanderson electronegativities (ln(1+x))
	SM1_Dze	Spectral moment of order 1 from Barysz matrix / weighted by Sanderson electronegativities
	VE1_Dze	Coefficient sum of the last eigenvector from Barysz matrix / weighted by Sanderson electronegativities
	VE2_Dze	Average coefficient sum of the last eigenvector from Barysz matrix / weighted by Sanderson electronegativities
	VE3_Dze	Logarithmic coefficient sum of the last eigenvector from Barysz matrix / weighted by Sanderson electronegativities
	VR1_Dze	Randic-like eigenvector-based index from Barysz matrix / weighted by Sanderson electronegativities
	VR2_Dze	Normalized Randic-like eigenvector-based index from Barysz matrix / weighted by Sanderson electronegativities
	VR3_Dze	Logarithmic Randic-like eigenvector-based index from Barysz matrix / weighted by Sanderson electronegativities
	SpAbs_Dzp	Graph energy from Barysz matrix / weighted by polarizabilities
	SpMax_Dzp	Leading eigenvalue from Barysz matrix / weighted by polarizabilities
	SpDiam_Dzp	Spectral diameter from Barysz matrix / weighted by polarizabilities
	SpAD_Dzp	Spectral absolute deviation from Barysz matrix / weighted by polarizabilities
	SpMAD_Dzp	Spectral mean absolute deviation from Barysz matrix / weighted by polarizabilities
	EE_Dzp	Estrada-like index from Barysz matrix / weighted by polarizabilities (ln(1+x))
	SM1_Dzp	Spectral moment of order 1 from Barysz matrix / weighted by polarizabilities
	VE1_Dzp	Coefficient sum of the last eigenvector from Barysz matrix / weighted by polarizabilities
	VE2_Dzp	Average coefficient sum of the last eigenvector from Barysz matrix / weighted by polarizabilities
	VE3_Dzp	Logarithmic coefficient sum of the last eigenvector from Barysz matrix / weighted by polarizabilities
	VR1_Dzp	Randic-like eigenvector-based index from Barysz matrix / weighted by polarizabilities
	VR2_Dzp	Normalized Randic-like eigenvector-based index from Barysz matrix / weighted by polarizabilities
	VR3_Dzp	Logarithmic Randic-like eigenvector-based index from Barysz matrix / weighted by polarizabilities
	SpAbs_Dzi	Graph energy from Barysz matrix / weighted by first ionization potential
	SpMax_Dzi	Leading eigenvalue from Barysz matrix / weighted by first ionization potential
	SpDiam_Dzi	Spectral diameter from Barysz matrix / weighted by first ionization potential
	SpAD_Dzi	Spectral absolute deviation from Barysz matrix / weighted by first ionization potential
	SpMAD_Dzi	Spectral mean absolute deviation from Barysz matrix / weighted by first ionization potential
	EE_Dzi	Estrada-like index from Barysz matrix / weighted by first ionization potential (ln(1+x))
	SM1_Dzi	Spectral moment of order 1 from Barysz matrix / weighted by first ionization potential
	VE1_Dzi	Coefficient sum of the last eigenvector from Barysz matrix / weighted by first ionization potential
	VE2_Dzi	Average coefficient sum of the last eigenvector from Barysz matrix / weighted by first ionization potential
	VE3_Dzi	Logarithmic coefficient sum of the last eigenvector from Barysz matrix / weighted by first ionization potential
	VR1_Dzi	Randic-like eigenvector-based index from Barysz matrix / weighted by first ionization potential
	VR2_Dzi	Normalized Randic-like eigenvector-based index from Barysz matrix / weighted by first ionization potential
	VR3_Dzi	Logarithmic Randic-like eigenvector-based index from Barysz matrix / weighted by first ionization potential
	SpAbs_Dzs	Graph energy from Barysz matrix / weighted by I-state
	SpMax_Dzs	Leading eigenvalue from Barysz matrix / weighted by I-state
	SpDiam_Dzs	Spectral diameter from Barysz matrix / weighted by I-state
	SpAD_Dzs	Spectral absolute deviation from Barysz matrix / weighted by I-state
	SpMAD_Dzs	Spectral mean absolute deviation from Barysz matrix / weighted by I-state
	EE_Dzs	Estrada-like index from Barysz matrix / weighted by I-state (ln(1+x))
	SM1_Dzs	Spectral moment of order 1 from Barysz matrix / weighted by I-state
	VE1_Dzs	Coefficient sum of the last eigenvector from Barysz matrix / weighted by I-state
	VE2_Dzs	Average coefficient sum of the last eigenvector from Barysz matrix / weighted by I-state
	VE3_Dzs	Logarithmic coefficient sum of the last eigenvector from Barysz matrix / weighted by I-state
	VR1_Dzs	Randic-like eigenvector-based index from Barysz matrix / weighted by I-state
	VR2_Dzs	Normalized Randic-like eigenvector-based index from Barysz matrix / weighted by I-state
	VR3_Dzs	Logarithmic Randic-like eigenvector-based index from Barysz matrix / weighted by I-state
BasicGroupCountDescriptor	nBase	Number of basic groups. The list of basic groups is defined by this SMARTS "[$([NH2]-[CX4])]", "[$([NH](-[CX4])-[CX4])]", "[$(N(-[CX4])(-[CX4])-[CX4])]", "[$([*;+;!$(*~[*;-])])]", "[$(N=C-N)]", and "[$(N-C=N)]" originally presented in JOELib
BCUTDescriptor	BCUTw-1l	nhigh lowest atom weighted BCUTS
	BCUTw-1h	nlow highest atom weighted BCUTS
	BCUTc-1l	nhigh lowest partial charge weighted BCUTS
	BCUTc-1h	nlow highest partial charge weighted BCUTS
	BCUTp-1l	nhigh lowest polarizability weighted BCUTS
	BCUTp-1h	nlow highest polarizability weighted BCUTS
PaDELBondCountDescriptor	nBonds	Number of bonds (excluding bonds with hydrogen)
	nBonds2	Total number of bonds (including bonds to hydrogens)
	nBondsS	Number of single bonds (including bonds with hydrogen)
	nBondsS2	Total number of single bonds (including bonds to hydrogens, excluding aromatic bonds)
	nBondsS3	Total number of single bonds (excluding bonds to hydrogens and aromatic bonds)
	nBondsD	Number of double bonds
	nBondsD2	Total number of double bonds (excluding bonds to aromatic bonds)
	nBondsT	Number of triple bonds
	nBondsQ	Number of quadruple bonds
	nBondsM	Total number of bonds that have bond order greater than one (aromatic bonds have bond order 1.5).
BPolDescriptor	bpol	Sum of the absolute value of the difference between atomic polarizabilities of all bonded atoms in the molecule (including implicit hydrogens)
BurdenModifiedEigenvaluesDescriptor	SpMax1_Bhm	Largest absolute eigenvalue of Burden modified matrix - n 1 / weighted by relative mass
	SpMax2_Bhm	Largest absolute eigenvalue of Burden modified matrix - n 2 / weighted by relative mass
	SpMax3_Bhm	Largest absolute eigenvalue of Burden modified matrix - n 3 / weighted by relative mass
	SpMax4_Bhm	Largest absolute eigenvalue of Burden modified matrix - n 4 / weighted by relative mass
	SpMax5_Bhm	Largest absolute eigenvalue of Burden modified matrix - n 5 / weighted by relative mass
	SpMax6_Bhm	Largest absolute eigenvalue of Burden modified matrix - n 6 / weighted by relative mass
	SpMax7_Bhm	Largest absolute eigenvalue of Burden modified matrix - n 7 / weighted by relative mass
	SpMax8_Bhm	Largest absolute eigenvalue of Burden modified matrix - n 8 / weighted by relative mass
	SpMin1_Bhm	Smallest absolute eigenvalue of Burden modified matrix - n 1 / weighted by relative mass
	SpMin2_Bhm	Smallest absolute eigenvalue of Burden modified matrix - n 2 / weighted by relative mass
	SpMin3_Bhm	Smallest absolute eigenvalue of Burden modified matrix - n 3 / weighted by relative mass
	SpMin4_Bhm	Smallest absolute eigenvalue of Burden modified matrix - n 4 / weighted by relative mass
	SpMin5_Bhm	Smallest absolute eigenvalue of Burden modified matrix - n 5 / weighted by relative mass
	SpMin6_Bhm	Smallest absolute eigenvalue of Burden modified matrix - n 6 / weighted by relative mass
	SpMin7_Bhm	Smallest absolute eigenvalue of Burden modified matrix - n 7 / weighted by relative mass
	SpMin8_Bhm	Smallest absolute eigenvalue of Burden modified matrix - n 8 / weighted by relative mass
	SpMax1_Bhv	Largest absolute eigenvalue of Burden modified matrix - n 1 / weighted by relative van der Waals volumes
	SpMax2_Bhv	Largest absolute eigenvalue of Burden modified matrix - n 2 / weighted by relative van der Waals volumes
	SpMax3_Bhv	Largest absolute eigenvalue of Burden modified matrix - n 3 / weighted by relative van der Waals volumes
	SpMax4_Bhv	Largest absolute eigenvalue of Burden modified matrix - n 4 / weighted by relative van der Waals volumes
	SpMax5_Bhv	Largest absolute eigenvalue of Burden modified matrix - n 5 / weighted by relative van der Waals volumes
	SpMax6_Bhv	Largest absolute eigenvalue of Burden modified matrix - n 6 / weighted by relative van der Waals volumes
	SpMax7_Bhv	Largest absolute eigenvalue of Burden modified matrix - n 7 / weighted by relative van der Waals volumes
	SpMax8_Bhv	Largest absolute eigenvalue of Burden modified matrix - n 8 / weighted by relative van der Waals volumes
	SpMin1_Bhv	Smallest absolute eigenvalue of Burden modified matrix - n 1 / weighted by relative van der Waals volumes
	SpMin2_Bhv	Smallest absolute eigenvalue of Burden modified matrix - n 2 / weighted by relative van der Waals volumes
	SpMin3_Bhv	Smallest absolute eigenvalue of Burden modified matrix - n 3 / weighted by relative van der Waals volumes
	SpMin4_Bhv	Smallest absolute eigenvalue of Burden modified matrix - n 4 / weighted by relative van der Waals volumes
	SpMin5_Bhv	Smallest absolute eigenvalue of Burden modified matrix - n 5 / weighted by relative van der Waals volumes
	SpMin6_Bhv	Smallest absolute eigenvalue of Burden modified matrix - n 6 / weighted by relative van der Waals volumes
	SpMin7_Bhv	Smallest absolute eigenvalue of Burden modified matrix - n 7 / weighted by relative van der Waals volumes
	SpMin8_Bhv	Smallest absolute eigenvalue of Burden modified matrix - n 8 / weighted by relative van der Waals volumes
	SpMax1_Bhe	Largest absolute eigenvalue of Burden modified matrix - n 1 / weighted by relative Sanderson electronegativities
	SpMax2_Bhe	Largest absolute eigenvalue of Burden modified matrix - n 2 / weighted by relative Sanderson electronegativities
	SpMax3_Bhe	Largest absolute eigenvalue of Burden modified matrix - n 3 / weighted by relative Sanderson electronegativities
	SpMax4_Bhe	Largest absolute eigenvalue of Burden modified matrix - n 4 / weighted by relative Sanderson electronegativities
	SpMax5_Bhe	Largest absolute eigenvalue of Burden modified matrix - n 5 / weighted by relative Sanderson electronegativities
	SpMax6_Bhe	Largest absolute eigenvalue of Burden modified matrix - n 6 / weighted by relative Sanderson electronegativities
	SpMax7_Bhe	Largest absolute eigenvalue of Burden modified matrix - n 7 / weighted by relative Sanderson electronegativities
	SpMax8_Bhe	Largest absolute eigenvalue of Burden modified matrix - n 8 / weighted by relative Sanderson electronegativities
	SpMin1_Bhe	Smallest absolute eigenvalue of Burden modified matrix - n 1 / weighted by relative Sanderson electronegativities
	SpMin2_Bhe	Smallest absolute eigenvalue of Burden modified matrix - n 2 / weighted by relative Sanderson electronegativities
	SpMin3_Bhe	Smallest absolute eigenvalue of Burden modified matrix - n 3 / weighted by relative Sanderson electronegativities
	SpMin4_Bhe	Smallest absolute eigenvalue of Burden modified matrix - n 4 / weighted by relative Sanderson electronegativities
	SpMin5_Bhe	Smallest absolute eigenvalue of Burden modified matrix - n 5 / weighted by relative Sanderson electronegativities
	SpMin6_Bhe	Smallest absolute eigenvalue of Burden modified matrix - n 6 / weighted by relative Sanderson electronegativities
	SpMin7_Bhe	Smallest absolute eigenvalue of Burden modified matrix - n 7 / weighted by relative Sanderson electronegativities
	SpMin8_Bhe	Smallest absolute eigenvalue of Burden modified matrix - n 8 / weighted by relative Sanderson electronegativities
	SpMax1_Bhp	Largest absolute eigenvalue of Burden modified matrix - n 1 / weighted by relative polarizabilities
	SpMax2_Bhp	Largest absolute eigenvalue of Burden modified matrix - n 2 / weighted by relative polarizabilities
	SpMax3_Bhp	Largest absolute eigenvalue of Burden modified matrix - n 3 / weighted by relative polarizabilities
	SpMax4_Bhp	Largest absolute eigenvalue of Burden modified matrix - n 4 / weighted by relative polarizabilities
	SpMax5_Bhp	Largest absolute eigenvalue of Burden modified matrix - n 5 / weighted by relative polarizabilities
	SpMax6_Bhp	Largest absolute eigenvalue of Burden modified matrix - n 6 / weighted by relative polarizabilities
	SpMax7_Bhp	Largest absolute eigenvalue of Burden modified matrix - n 7 / weighted by relative polarizabilities
	SpMax8_Bhp	Largest absolute eigenvalue of Burden modified matrix - n 8 / weighted by relative polarizabilities
	SpMin1_Bhp	Smallest absolute eigenvalue of Burden modified matrix - n 1 / weighted by relative polarizabilities
	SpMin2_Bhp	Smallest absolute eigenvalue of Burden modified matrix - n 2 / weighted by relative polarizabilities
	SpMin3_Bhp	Smallest absolute eigenvalue of Burden modified matrix - n 3 / weighted by relative polarizabilities
	SpMin4_Bhp	Smallest absolute eigenvalue of Burden modified matrix - n 4 / weighted by relative polarizabilities
	SpMin5_Bhp	Smallest absolute eigenvalue of Burden modified matrix - n 5 / weighted by relative polarizabilities
	SpMin6_Bhp	Smallest absolute eigenvalue of Burden modified matrix - n 6 / weighted by relative polarizabilities
	SpMin7_Bhp	Smallest absolute eigenvalue of Burden modified matrix - n 7 / weighted by relative polarizabilities
	SpMin8_Bhp	Smallest absolute eigenvalue of Burden modified matrix - n 8 / weighted by relative polarizabilities
	SpMax1_Bhi	Largest absolute eigenvalue of Burden modified matrix - n 1 / weighted by relative first ionization potential
	SpMax2_Bhi	Largest absolute eigenvalue of Burden modified matrix - n 2 / weighted by relative first ionization potential
	SpMax3_Bhi	Largest absolute eigenvalue of Burden modified matrix - n 3 / weighted by relative first ionization potential
	SpMax4_Bhi	Largest absolute eigenvalue of Burden modified matrix - n 4 / weighted by relative first ionization potential
	SpMax5_Bhi	Largest absolute eigenvalue of Burden modified matrix - n 5 / weighted by relative first ionization potential
	SpMax6_Bhi	Largest absolute eigenvalue of Burden modified matrix - n 6 / weighted by relative first ionization potential
	SpMax7_Bhi	Largest absolute eigenvalue of Burden modified matrix - n 7 / weighted by relative first ionization potential
	SpMax8_Bhi	Largest absolute eigenvalue of Burden modified matrix - n 8 / weighted by relative first ionization potential
	SpMin1_Bhi	Smallest absolute eigenvalue of Burden modified matrix - n 1 / weighted by relative first ionization potential
	SpMin2_Bhi	Smallest absolute eigenvalue of Burden modified matrix - n 2 / weighted by relative first ionization potential
	SpMin3_Bhi	Smallest absolute eigenvalue of Burden modified matrix - n 3 / weighted by relative first ionization potential
	SpMin4_Bhi	Smallest absolute eigenvalue of Burden modified matrix - n 4 / weighted by relative first ionization potential
	SpMin5_Bhi	Smallest absolute eigenvalue of Burden modified matrix - n 5 / weighted by relative first ionization potential
	SpMin6_Bhi	Smallest absolute eigenvalue of Burden modified matrix - n 6 / weighted by relative first ionization potential
	SpMin7_Bhi	Smallest absolute eigenvalue of Burden modified matrix - n 7 / weighted by relative first ionization potential
	SpMin8_Bhi	Smallest absolute eigenvalue of Burden modified matrix - n 8 / weighted by relative first ionization potential
	SpMax1_Bhs	Largest absolute eigenvalue of Burden modified matrix - n 1 / weighted by relative I-state
	SpMax2_Bhs	Largest absolute eigenvalue of Burden modified matrix - n 2 / weighted by relative I-state
	SpMax3_Bhs	Largest absolute eigenvalue of Burden modified matrix - n 3 / weighted by relative I-state
	SpMax4_Bhs	Largest absolute eigenvalue of Burden modified matrix - n 4 / weighted by relative I-state
	SpMax5_Bhs	Largest absolute eigenvalue of Burden modified matrix - n 5 / weighted by relative I-state
	SpMax6_Bhs	Largest absolute eigenvalue of Burden modified matrix - n 6 / weighted by relative I-state
	SpMax7_Bhs	Largest absolute eigenvalue of Burden modified matrix - n 7 / weighted by relative I-state
	SpMax8_Bhs	Largest absolute eigenvalue of Burden modified matrix - n 8 / weighted by relative I-state
	SpMin1_Bhs	Smallest absolute eigenvalue of Burden modified matrix - n 1 / weighted by relative I-state
	SpMin2_Bhs	Smallest absolute eigenvalue of Burden modified matrix - n 2 / weighted by relative I-state
	SpMin3_Bhs	Smallest absolute eigenvalue of Burden modified matrix - n 3 / weighted by relative I-state
	SpMin4_Bhs	Smallest absolute eigenvalue of Burden modified matrix - n 4 / weighted by relative I-state
	SpMin5_Bhs	Smallest absolute eigenvalue of Burden modified matrix - n 5 / weighted by relative I-state
	SpMin6_Bhs	Smallest absolute eigenvalue of Burden modified matrix - n 6 / weighted by relative I-state
	SpMin7_Bhs	Smallest absolute eigenvalue of Burden modified matrix - n 7 / weighted by relative I-state
	SpMin8_Bhs	Smallest absolute eigenvalue of Burden modified matrix - n 8 / weighted by relative I-state
PaDELCarbonTypesDescriptor	C1SP1	Triply bound carbon bound to one other carbon
	C2SP1	Triply bound carbon bound to two other carbons
	C1SP2	Doubly bound carbon bound to one other carbon
	C2SP2	Doubly bound carbon bound to two other carbons
	C3SP2	Doubly bound carbon bound to three other carbons
	C1SP3	Singly bound carbon bound to one other carbon
	C2SP3	Singly bound carbon bound to two other carbons
	C3SP3	Singly bound carbon bound to three other carbons
	C4SP3	Singly bound carbon bound to four other carbons
ChiChainDescriptor	SCH-3	Simple chain, order 3
	SCH-4	Simple chain, order 4
	SCH-5	Simple chain, order 5
	SCH-6	Simple chain, order 6
	SCH-7	Simple chain, order 7
	VCH-3	Valence chain, order 3
	VCH-4	Valence chain, order 4
	VCH-5	Valence chain, order 5
	VCH-6	Valence chain, order 6
	VCH-7	Valence chain, order 7
ChiClusterDescriptor	SC-3	Simple cluster, order 3
	SC-4	Simple cluster, order 4
	SC-5	Simple cluster, order 5
	SC-6	Simple cluster, order 6
	VC-3	Valence cluster, order 3
	VC-4	Valence cluster, order 4
	VC-5	Valence cluster, order 5
	VC-6	Valence cluster, order 6
ChiPathClusterDescriptor	SPC-4	Simple path cluster, order 4
	SPC-5	Simple path cluster, order 5
	SPC-6	Simple path cluster, order 6
	VPC-4	Valence path cluster, order 4
	VPC-5	Valence path cluster, order 5
	VPC-6	Valence path cluster, order 6
PaDELChiPathDescriptor	SP-0	Simple path, order 0
	SP-1	Simple path, order 1
	SP-2	Simple path, order 2
	SP-3	Simple path, order 3
	SP-4	Simple path, order 4
	SP-5	Simple path, order 5
	SP-6	Simple path, order 6
	SP-7	Simple path, order 7
	ASP-0	Average simple path, order 0
	ASP-1	Average simple path, order 1
	ASP-2	Average simple path, order 2
	ASP-3	Average simple path, order 3
	ASP-4	Average simple path, order 4
	ASP-5	Average simple path, order 5
	ASP-6	Average simple path, order 6
	ASP-7	Average simple path, order 7
	VP-0	Valence path, order 0
	VP-1	Valence path, order 1
	VP-2	Valence path, order 2
	VP-3	Valence path, order 3
	VP-4	Valence path, order 4
	VP-5	Valence path, order 5
	VP-6	Valence path, order 6
	VP-7	Valence path, order 7
	AVP-0	Average valence path, order 0
	AVP-1	Average valence path, order 1
	AVP-2	Average valence path, order 2
	AVP-3	Average valence path, order 3
	AVP-4	Average valence path, order 4
	AVP-5	Average valence path, order 5
	AVP-6	Average valence path, order 6
	AVP-7	Average valence path, order 7
ConstitutionalDescriptor	Sv	Sum of atomic van der Waals volumes (scaled on carbon atom)
	Sse	Sum of atomic Sanderson electronegativities (scaled on carbon atom)
	Spe	Sum of atomic Pauling electronegativities (scaled on carbon atom)
	Sare	Sum of atomic Allred-Rochow electronegativities (scaled on carbon atom)
	Sp	Sum of atomic polarizabilities (scaled on carbon atom)
	Si	Sum of first first ionization potentials (scaled on carbon atom)
	Mv	Mean atomic van der Waals volumes (scaled on carbon atom)
	Mse	Mean atomic Sanderson electronegativities (scaled on carbon atom)
	Mpe	Mean atomic Pauling electronegativities (scaled on carbon atom)
	Mare	Mean atomic Allred-Rochow electronegativities (scaled on carbon atom)
	Mp	Mean atomic polarizabilities (scaled on carbon atom)
	Mi	Mean first first ionization potentials (scaled on carbon atom)
CrippenDescriptor	CrippenLogP	Crippen's LogP
	CrippenMR	Crippen's molar refractivity
DetourMatrixDescriptor	SpMax_Dt	Leading eigenvalue from detour matrix
	SpDiam_Dt	Spectral diameter from detour matrix
	SpAD_Dt	Spectral absolute deviation from detour matrix
	SpMAD_Dt	Spectral mean absolute deviation from detour matrix
	EE_Dt	Estrada-like index from detour matrix
	VE1_Dt	Coefficient sum of the last eigenvector from detour matrix
	VE2_Dt	Average coefficient sum of the last eigenvector from detour matrix
	VE3_Dt	Logarithmic coefficient sum of the last eigenvector from detour matrix
	VR1_Dt	Randic-like eigenvector-based index from detour matrix
	VR2_Dt	Normalized Randic-like eigenvector-based index from detour matrix
	VR3_Dt	Logarithmic Randic-like eigenvector-based index from detour matrix
EccentricConnectivityIndexDescriptor	ECCEN	A topological descriptor combining distance and adjacency information
ElectrotopologicalStateAtomTypeDescriptor	nHBd	Count of E-States for (strong) Hydrogen Bond donors
	nwHBd	Count of E-States for weak Hydrogen Bond donors
	nHBa	Count of E-States for (strong) Hydrogen Bond acceptors
	nwHBa	Count of E-States for weak Hydrogen Bond acceptors
	nHBint2	Count of E-State descriptors of strength for potential Hydrogen Bonds of path length 2
	nHBint3	Count of E-State descriptors of strength for potential Hydrogen Bonds of path length 3
	nHBint4	Count of E-State descriptors of strength for potential Hydrogen Bonds of path length 4
	nHBint5	Count of E-State descriptors of strength for potential Hydrogen Bonds of path length 5
	nHBint6	Count of E-State descriptors of strength for potential Hydrogen Bonds of path length 6
	nHBint7	Count of E-State descriptors of strength for potential Hydrogen Bonds of path length 7
	nHBint8	Count of E-State descriptors of strength for potential Hydrogen Bonds of path length 8
	nHBint9	Count of E-State descriptors of strength for potential Hydrogen Bonds of path length 9
	nHBint10	Count of E-State descriptors of strength for potential Hydrogen Bonds of path length 10
	nHsOH	Count of atom-type H E-State: -OH
	nHdNH	Count of atom-type H E-State: =NH
	nHsSH	Count of atom-type H E-State: -SH
	nHsNH2	Count of atom-type H E-State: -NH2
	nHssNH	Count of atom-type H E-State: -NH-
	nHaaNH	Count of atom-type H E-State: :NH:
	nHsNH3p	Count of atom-type H E-State: -NH3+
	nHssNH2p	Count of atom-type H E-State: -NH2-+
	nHsssNHp	Count of atom-type H E-State: >NH-+
	nHtCH	Count of atom-type H E-State: #CH
	nHdCH2	Count of atom-type H E-State: =CH2
	nHdsCH	Count of atom-type H E-State: =CH-
	nHaaCH	Count of atom-type H E-State: :CH:
	nHCHnX	Count of atom-type H E-State: CHnX
	nHCsats	Count of atom-type H E-State: H bonded to B, Si, P, Ge, As, Se, Sn or Pb
	nHCsatu	Count of atom-type H E-State: H on C sp3 bonded to unsaturated C
	nHAvin	Count of atom-type H E-State: H on C vinyl bonded to C aromatic
	nHother	Count of atom-type H E-State: H on aaCH, dCH2 or dsCH
	nHmisc	Count of atom-type H E-State: H bonded to B, Si, P, Ge, As, Se, Sn or Pb
	nsLi	Count of atom-type E-State: -Li
	nssBe	Count of atom-type E-State: -Be-
	nssssBem	Count of atom-type E-State: >Be<-2
	nsBH2	Count of atom-type E-State: -BH2
	nssBH	Count of atom-type E-State: -BH-
	nsssB	Count of atom-type E-State: -B<
	nssssBm	Count of atom-type E-State: >B<-
	nsCH3	Count of atom-type E-State: -CH3
	ndCH2	Count of atom-type E-State: =CH2
	nssCH2	Count of atom-type E-State: -CH2-
	ntCH	Count of atom-type E-State: #CH
	ndsCH	Count of atom-type E-State: =CH-
	naaCH	Count of atom-type E-State: :CH:
	nsssCH	Count of atom-type E-State: >CH-
	nddC	Count of atom-type E-State: =C=
	ntsC	Count of atom-type E-State: #C-
	ndssC	Count of atom-type E-State: =C<
	naasC	Count of atom-type E-State: :C:-
	naaaC	Count of atom-type E-State: ::C:
	nssssC	Count of atom-type E-State: >C<
	nsNH3p	Count of atom-type E-State: -NH3+
	nsNH2	Count of atom-type E-State: -NH2
	nssNH2p	Count of atom-type E-State: -NH2-+
	ndNH	Count of atom-type E-State: =NH
	nssNH	Count of atom-type E-State: -NH-
	naaNH	Count of atom-type E-State: :NH:
	ntN	Count of atom-type E-State: #N
	nsssNHp	Count of atom-type E-State: >NH-+
	ndsN	Count of atom-type E-State: =N-
	naaN	Count of atom-type E-State: :N:
	nsssN	Count of atom-type E-State: >N-
	nddsN	Count of atom-type E-State: -N<<
	naasN	Count of atom-type E-State: :N:-
	nssssNp	Count of atom-type E-State: >N<+
	nsOH	Count of atom-type E-State: -OH
	ndO	Count of atom-type E-State: =O
	nssO	Count of atom-type E-State: -O-
	naaO	Count of atom-type E-State: :O:
	naOm	Count of atom-type E-State: :O-0.5
	nsOm	Count of atom-type E-State: -O-
	nsF	Count of atom-type E-State: -F
	nsSiH3	Count of atom-type E-State: -SiH3
	nssSiH2	Count of atom-type E-State: -SiH2-
	nsssSiH	Count of atom-type E-State: >SiH-
	nssssSi	Count of atom-type E-State: >Si<
	nsPH2	Count of atom-type E-State: -PH2
	nssPH	Count of atom-type E-State: -PH-
	nsssP	Count of atom-type E-State: >P-
	ndsssP	Count of atom-type E-State: ->P=
	nddsP	Count of atom-type E-State: -=P=
	nsssssP	Count of atom-type E-State: ->P<
	nsSH	Count of atom-type E-State: -SH
	ndS	Count of atom-type E-State: =S
	nssS	Count of atom-type E-State: -S-
	naaS	Count of atom-type E-State: aSa
	ndssS	Count of atom-type E-State: >S=
	nddssS	Count of atom-type E-State: >S==
	nssssssS	Count of atom-type E-State: >S<<
	nSm	Count of atom-type E-State: -S-
	nsCl	Count of atom-type E-State: -Cl
	nsGeH3	Count of atom-type E-State: -GeH3
	nssGeH2	Count of atom-type E-State: -GeH2-
	nsssGeH	Count of atom-type E-State: >GeH-
	nssssGe	Count of atom-type E-State: >Ge<
	nsAsH2	Count of atom-type E-State: -AsH2
	nssAsH	Count of atom-type E-State: -AsH-
	nsssAs	Count of atom-type E-State: >As-
	ndsssAs	Count of atom-type E-State: ->As=
	nddsAs	Count of atom-type E-State: -=As=
	nsssssAs	Count of atom-type E-State: ->As<
	nsSeH	Count of atom-type E-State: -SeH
	ndSe	Count of atom-type E-State: =Se
	nssSe	Count of atom-type E-State: -Se-
	naaSe	Count of atom-type E-State: aSea
	ndssSe	Count of atom-type E-State: >Se=
	nssssssSe	Count of atom-type E-State: >Se<<
	nddssSe	Count of atom-type E-State: -=Se=-
	nsBr	Count of atom-type E-State: -Br
	nsSnH3	Count of atom-type E-State: -SnH3
	nssSnH2	Count of atom-type E-State: -SnH2-
	nsssSnH	Count of atom-type E-State: >SnH-
	nssssSn	Count of atom-type E-State: >Sn<
	nsI	Count of atom-type E-State: -I
	nsPbH3	Count of atom-type E-State: -PbH3
	nssPbH2	Count of atom-type E-State: -PbH2-
	nsssPbH	Count of atom-type E-State: >PbH-
	nssssPb	Count of atom-type E-State: >Pb<
	SHBd	Sum of E-States for (strong) hydrogen bond donors
	SwHBd	Sum of E-States for weak hydrogen bond donors
	SHBa	Sum of E-States for (strong) hydrogen bond acceptors
	SwHBa	Sum of E-States for weak hydrogen bond acceptors
	SHBint2	Sum of E-State descriptors of strength for potential hydrogen bonds of path length 2
	SHBint3	Sum of E-State descriptors of strength for potential hydrogen bonds of path length 3
	SHBint4	Sum of E-State descriptors of strength for potential hydrogen bonds of path length 4
	SHBint5	Sum of E-State descriptors of strength for potential hydrogen bonds of path length 5
	SHBint6	Sum of E-State descriptors of strength for potential hydrogen bonds of path length 6
	SHBint7	Sum of E-State descriptors of strength for potential hydrogen bonds of path length 7
	SHBint8	Sum of E-State descriptors of strength for potential hydrogen bonds of path length 8
	SHBint9	Sum of E-State descriptors of strength for potential hydrogen bonds of path length 9
	SHBint10	Sum of E-State descriptors of strength for potential hydrogen bonds of path length 10
	SHsOH	Sum of atom-type H E-State: -OH
	SHdNH	Sum of atom-type H E-State: =NH
	SHsSH	Sum of atom-type H E-State: -SH
	SHsNH2	Sum of atom-type H E-State: -NH2
	SHssNH	Sum of atom-type H E-State: -NH-
	SHaaNH	Sum of atom-type H E-State: :NH:
	SHsNH3p	Sum of atom-type H E-State: -NH3+
	SHssNH2p	Sum of atom-type H E-State: -NH2-+
	SHsssNHp	Sum of atom-type H E-State: >NH-+
	SHtCH	Sum of atom-type H E-State: #CH
	SHdCH2	Sum of atom-type H E-State: =CH2
	SHdsCH	Sum of atom-type H E-State: =CH-
	SHaaCH	Sum of atom-type H E-State: :CH:
	SHCHnX	Sum of atom-type H E-State: CHnX
	SHCsats	Sum of atom-type H E-State: H on C sp3 bonded to saturated C
	SHCsatu	Sum of atom-type H E-State: H on C sp3 bonded to unsaturated C
	SHAvin	Sum of atom-type H E-State: H on C vinyl bonded to C aromatic
	SHother	Sum of atom-type H E-State: H on aaCH, dCH2 or dsCH
	SHmisc	Sum of atom-type H E-State: H bonded to B, Si, P, Ge, As, Se, Sn or Pb
	SsLi	Sum of atom-type E-State: -Li
	SssBe	Sum of atom-type E-State: -Be-
	SssssBem	Sum of atom-type E-State: >Be<-2
	SsBH2	Sum of atom-type E-State: -BH2
	SssBH	Sum of atom-type E-State: -BH-
	SsssB	Sum of atom-type E-State: -B<
	SssssBm	Sum of atom-type E-State: >B<-
	SsCH3	Sum of atom-type E-State: -CH3
	SdCH2	Sum of atom-type E-State: =CH2
	SssCH2	Sum of atom-type E-State: -CH2-
	StCH	Sum of atom-type E-State: #CH
	SdsCH	Sum of atom-type E-State: =CH-
	SaaCH	Sum of atom-type E-State: :CH:
	SsssCH	Sum of atom-type E-State: >CH-
	SddC	Sum of atom-type E-State: =C=
	StsC	Sum of atom-type E-State: #C-
	SdssC	Sum of atom-type E-State: =C<
	SaasC	Sum of atom-type E-State: :C:-
	SaaaC	Sum of atom-type E-State: ::C:
	SssssC	Sum of atom-type E-State: >C<
	SsNH3p	Sum of atom-type E-State: -NH3+
	SsNH2	Sum of atom-type E-State: -NH2
	SssNH2p	Sum of atom-type E-State: -NH2-+
	SdNH	Sum of atom-type E-State: =NH
	SssNH	Sum of atom-type E-State: -NH-
	SaaNH	Sum of atom-type E-State: :NH:
	StN	Sum of atom-type E-State: #N
	SsssNHp	Sum of atom-type E-State: >NH-+
	SdsN	Sum of atom-type E-State: =N-
	SaaN	Sum of atom-type E-State: :N:
	SsssN	Sum of atom-type E-State: >N-
	SddsN	Sum of atom-type E-State: -N<<
	SaasN	Sum of atom-type E-State: :N:-
	SssssNp	Sum of atom-type E-State: >N<+
	SsOH	Sum of atom-type E-State: -OH
	SdO	Sum of atom-type E-State: =O
	SssO	Sum of atom-type E-State: -O-
	SaaO	Sum of atom-type E-State: :O:
	SaOm	Sum of atom-type E-State: :O-0.5
	SsOm	Sum of atom-type E-State: -O-
	SsF	Sum of atom-type E-State: -F
	SsSiH3	Sum of atom-type E-State: -SiH3
	SssSiH2	Sum of atom-type E-State: -SiH2-
	SsssSiH	Sum of atom-type E-State: >SiH-
	SssssSi	Sum of atom-type E-State: >Si<
	SsPH2	Sum of atom-type E-State: -PH2
	SssPH	Sum of atom-type E-State: -PH-
	SsssP	Sum of atom-type E-State: >P-
	SdsssP	Sum of atom-type E-State: ->P=
	SddsP	Sum of atom-type E-State: -=P=
	SsssssP	Sum of atom-type E-State: ->P<
	SsSH	Sum of atom-type E-State: -SH
	SdS	Sum of atom-type E-State: =S
	SssS	Sum of atom-type E-State: -S-
	SaaS	Sum of atom-type E-State: aSa
	SdssS	Sum of atom-type E-State: >S=
	SddssS	Sum of atom-type E-State: >S==
	SssssssS	Sum of atom-type E-State: >S<<
	SSm	Sum of atom-type E-State: -S-
	SsCl	Sum of atom-type E-State: -Cl
	SsGeH3	Sum of atom-type E-State: -GeH3
	SssGeH2	Sum of atom-type E-State: -GeH2-
	SsssGeH	Sum of atom-type E-State: >GeH-
	SssssGe	Sum of atom-type E-State: >Ge<
	SsAsH2	Sum of atom-type E-State: -AsH2
	SssAsH	Sum of atom-type E-State: -AsH-
	SsssAs	Sum of atom-type E-State: >As-
	SdsssAs	Sum of atom-type E-State: ->As=
	SddsAs	Sum of atom-type E-State: -=As=
	SsssssAs	Sum of atom-type E-State: ->As<
	SsSeH	Sum of atom-type E-State: -SeH
	SdSe	Sum of atom-type E-State: =Se
	SssSe	Sum of atom-type E-State: -Se-
	SaaSe	Sum of atom-type E-State: aSea
	SdssSe	Sum of atom-type E-State: >Se=
	SssssssSe	Sum of atom-type E-State: >Se<<
	SddssSe	Sum of atom-type E-State: -=Se=-
	SsBr	Sum of atom-type E-State: -Br
	SsSnH3	Sum of atom-type E-State: -SnH3
	SssSnH2	Sum of atom-type E-State: -SnH2-
	SsssSnH	Sum of atom-type E-State: >SnH-
	SssssSn	Sum of atom-type E-State: >Sn<
	SsI	Sum of atom-type E-State: -I
	SsPbH3	Sum of atom-type E-State: -PbH3
	SssPbH2	Sum of atom-type E-State: -PbH2-
	SsssPbH	Sum of atom-type E-State: >PbH-
	SssssPb	Sum of atom-type E-State: >Pb<
	minHBd	Minimum E-States for (strong) Hydrogen Bond donors
	minwHBd	Minimum E-States for weak Hydrogen Bond donors
	minHBa	Minimum E-States for (strong) Hydrogen Bond acceptors
	minwHBa	Minimum E-States for weak Hydrogen Bond acceptors
	minHBint2	Minimum E-State descriptors of strength for potential Hydrogen Bonds of path length 2
	minHBint3	Minimum E-State descriptors of strength for potential Hydrogen Bonds of path length 3
	minHBint4	Minimum E-State descriptors of strength for potential Hydrogen Bonds of path length 4
	minHBint5	Minimum E-State descriptors of strength for potential Hydrogen Bonds of path length 5
	minHBint6	Minimum E-State descriptors of strength for potential Hydrogen Bonds of path length 6
	minHBint7	Minimum E-State descriptors of strength for potential Hydrogen Bonds of path length 7
	minHBint8	Minimum E-State descriptors of strength for potential Hydrogen Bonds of path length 8
	minHBint9	Minimum E-State descriptors of strength for potential Hydrogen Bonds of path length 9
	minHBint10	Minimum E-State descriptors of strength for potential Hydrogen Bonds of path length 10
	minHsOH	Minimum atom-type H E-State: -OH
	minHdNH	Minimum atom-type H E-State: =NH
	minHsSH	Minimum atom-type H E-State: -SH
	minHsNH2	Minimum atom-type H E-State: -NH2
	minHssNH	Minimum atom-type H E-State: -NH-
	minHaaNH	Minimum atom-type H E-State: :NH:
	minHsNH3p	Minimum atom-type H E-State: -NH3+
	minHssNH2p	Minimum atom-type H E-State: -NH2-+
	minHsssNHp	Minimum atom-type H E-State: >NH-+
	minHtCH	Minimum atom-type H E-State: #CH
	minHdCH2	Minimum atom-type H E-State: =CH2
	minHdsCH	Minimum atom-type H E-State: =CH-
	minHaaCH	Minimum atom-type H E-State: :CH:
	minHCHnX	Minimum atom-type H E-State: CHnX
	minHCsats	Minimum atom-type H E-State: H bonded to B, Si, P, Ge, As, Se, Sn or Pb
	minHCsatu	Minimum atom-type H E-State: H on C sp3 bonded to unsaturated C
	minHAvin	Minimum atom-type H E-State: H on C vinyl bonded to C aromatic
	minHother	Minimum atom-type H E-State: H on aaCH, dCH2 or dsCH
	minHmisc	Minimum atom-type H E-State: H bonded to B, Si, P, Ge, As, Se, Sn or Pb
	minsLi	Minimum atom-type E-State: -Li
	minssBe	Minimum atom-type E-State: -Be-
	minssssBem	Minimum atom-type E-State: >Be<-2
	minsBH2	Minimum atom-type E-State: -BH2
	minssBH	Minimum atom-type E-State: -BH-
	minsssB	Minimum atom-type E-State: -B<
	minssssBm	Minimum atom-type E-State: >B<-
	minsCH3	Minimum atom-type E-State: -CH3
	mindCH2	Minimum atom-type E-State: =CH2
	minssCH2	Minimum atom-type E-State: -CH2-
	mintCH	Minimum atom-type E-State: #CH
	mindsCH	Minimum atom-type E-State: =CH-
	minaaCH	Minimum atom-type E-State: :CH:
	minsssCH	Minimum atom-type E-State: >CH-
	minddC	Minimum atom-type E-State: =C=
	mintsC	Minimum atom-type E-State: #C-
	mindssC	Minimum atom-type E-State: =C<
	minaasC	Minimum atom-type E-State: :C:-
	minaaaC	Minimum atom-type E-State: ::C:
	minssssC	Minimum atom-type E-State: >C<
	minsNH3p	Minimum atom-type E-State: -NH3+
	minsNH2	Minimum atom-type E-State: -NH2
	minssNH2p	Minimum atom-type E-State: -NH2-+
	mindNH	Minimum atom-type E-State: =NH
	minssNH	Minimum atom-type E-State: -NH-
	minaaNH	Minimum atom-type E-State: :NH:
	mintN	Minimum atom-type E-State: #N
	minsssNHp	Minimum atom-type E-State: >NH-+
	mindsN	Minimum atom-type E-State: =N-
	minaaN	Minimum atom-type E-State: :N:
	minsssN	Minimum atom-type E-State: >N-
	minddsN	Minimum atom-type E-State: -N<<
	minaasN	Minimum atom-type E-State: :N:-
	minssssNp	Minimum atom-type E-State: >N<+
	minsOH	Minimum atom-type E-State: -OH
	mindO	Minimum atom-type E-State: =O
	minssO	Minimum atom-type E-State: -O-
	minaaO	Minimum atom-type E-State: :O:
	minaOm	Minimum atom-type E-State: :O-0.5
	minsOm	Minimum atom-type E-State: -O-
	minsF	Minimum atom-type E-State: -F
	minsSiH3	Minimum atom-type E-State: -SiH3
	minssSiH2	Minimum atom-type E-State: -SiH2-
	minsssSiH	Minimum atom-type E-State: >SiH-
	minssssSi	Minimum atom-type E-State: >Si<
	minsPH2	Minimum atom-type E-State: -PH2
	minssPH	Minimum atom-type E-State: -PH-
	minsssP	Minimum atom-type E-State: >P-
	mindsssP	Minimum atom-type E-State: ->P=
	minddsP	Minimum atom-type E-State: -=P=
	minsssssP	Minimum atom-type E-State: ->P<
	minsSH	Minimum atom-type E-State: -SH
	mindS	Minimum atom-type E-State: =S
	minssS	Minimum atom-type E-State: -S-
	minaaS	Minimum atom-type E-State: aSa
	mindssS	Minimum atom-type E-State: >S=
	minddssS	Minimum atom-type E-State: >S==
	minssssssS	Minimum atom-type E-State: >S<<
	minSm	Minimum atom-type E-State: -S-
	minsCl	Minimum atom-type E-State: -Cl
	minsGeH3	Minimum atom-type E-State: -GeH3
	minssGeH2	Minimum atom-type E-State: -GeH2-
	minsssGeH	Minimum atom-type E-State: >GeH-
	minssssGe	Minimum atom-type E-State: >Ge<
	minsAsH2	Minimum atom-type E-State: -AsH2
	minssAsH	Minimum atom-type E-State: -AsH-
	minsssAs	Minimum atom-type E-State: >As-
	mindsssAs	Minimum atom-type E-State: ->As=
	minddsAs	Minimum atom-type E-State: -=As=
	minsssssAs	Minimum atom-type E-State: ->As<
	minsSeH	Minimum atom-type E-State: -SeH
	mindSe	Minimum atom-type E-State: =Se
	minssSe	Minimum atom-type E-State: -Se-
	minaaSe	Minimum atom-type E-State: aSea
	mindssSe	Minimum atom-type E-State: >Se=
	minssssssSe	Minimum atom-type E-State: >Se<<
	minddssSe	Minimum atom-type E-State: -=Se=-
	minsBr	Minimum atom-type E-State: -Br
	minsSnH3	Minimum atom-type E-State: -SnH3
	minssSnH2	Minimum atom-type E-State: -SnH2-
	minsssSnH	Minimum atom-type E-State: >SnH-
	minssssSn	Minimum atom-type E-State: >Sn<
	minsI	Minimum atom-type E-State: -I
	minsPbH3	Minimum atom-type E-State: -PbH3
	minssPbH2	Minimum atom-type E-State: -PbH2-
	minsssPbH	Minimum atom-type E-State: >PbH-
	minssssPb	Minimum atom-type E-State: >Pb<
	maxHBd	Maximum E-States for (strong) Hydrogen Bond donors
	maxwHBd	Maximum E-States for weak Hydrogen Bond donors
	maxHBa	Maximum E-States for (strong) Hydrogen Bond acceptors
	maxwHBa	Maximum E-States for weak Hydrogen Bond acceptors
	maxHBint2	Maximum E-State descriptors of strength for potential Hydrogen Bonds of path length 2
	maxHBint3	Maximum E-State descriptors of strength for potential Hydrogen Bonds of path length 3
	maxHBint4	Maximum E-State descriptors of strength for potential Hydrogen Bonds of path length 4
	maxHBint5	Maximum E-State descriptors of strength for potential Hydrogen Bonds of path length 5
	maxHBint6	Maximum E-State descriptors of strength for potential Hydrogen Bonds of path length 6
	maxHBint7	Maximum E-State descriptors of strength for potential Hydrogen Bonds of path length 7
	maxHBint8	Maximum E-State descriptors of strength for potential Hydrogen Bonds of path length 8
	maxHBint9	Maximum E-State descriptors of strength for potential Hydrogen Bonds of path length 9
	maxHBint10	Maximum E-State descriptors of strength for potential Hydrogen Bonds of path length 10
	maxHsOH	Maximum atom-type H E-State: -OH
	maxHdNH	Maximum atom-type H E-State: =NH
	maxHsSH	Maximum atom-type H E-State: -SH
	maxHsNH2	Maximum atom-type H E-State: -NH2
	maxHssNH	Maximum atom-type H E-State: -NH-
	maxHaaNH	Maximum atom-type H E-State: :NH:
	maxHsNH3p	Maximum atom-type H E-State: -NH3+
	maxHssNH2p	Maximum atom-type H E-State: -NH2-+
	maxHsssNHp	Maximum atom-type H E-State: >NH-+
	maxHtCH	Maximum atom-type H E-State: #CH
	maxHdCH2	Maximum atom-type H E-State: =CH2
	maxHdsCH	Maximum atom-type H E-State: =CH-
	maxHaaCH	Maximum atom-type H E-State: :CH:
	maxHCHnX	Maximum atom-type H E-State: CHnX
	maxHCsats	Maximum atom-type H E-State: H bonded to B, Si, P, Ge, As, Se, Sn or Pb
	maxHCsatu	Maximum atom-type H E-State: H on C sp3 bonded to unsaturated C
	maxHAvin	Maximum atom-type H E-State: H on C vinyl bonded to C aromatic
	maxHother	Maximum atom-type H E-State: H on aaCH, dCH2 or dsCH
	maxHmisc	Maximum atom-type H E-State: H bonded to B, Si, P, Ge, As, Se, Sn or Pb
	maxsLi	Maximum atom-type E-State: -Li
	maxssBe	Maximum atom-type E-State: -Be-
	maxssssBem	Maximum atom-type E-State: >Be<-2
	maxsBH2	Maximum atom-type E-State: -BH2
	maxssBH	Maximum atom-type E-State: -BH-
	maxsssB	Maximum atom-type E-State: -B<
	maxssssBm	Maximum atom-type E-State: >B<-
	maxsCH3	Maximum atom-type E-State: -CH3
	maxdCH2	Maximum atom-type E-State: =CH2
	maxssCH2	Maximum atom-type E-State: -CH2-
	maxtCH	Maximum atom-type E-State: #CH
	maxdsCH	Maximum atom-type E-State: =CH-
	maxaaCH	Maximum atom-type E-State: :CH:
	maxsssCH	Maximum atom-type E-State: >CH-
	maxddC	Maximum atom-type E-State: =C=
	maxtsC	Maximum atom-type E-State: #C-
	maxdssC	Maximum atom-type E-State: =C<
	maxaasC	Maximum atom-type E-State: :C:-
	maxaaaC	Maximum atom-type E-State: ::C:
	maxssssC	Maximum atom-type E-State: >C<
	maxsNH3p	Maximum atom-type E-State: -NH3+
	maxsNH2	Maximum atom-type E-State: -NH2
	maxssNH2p	Maximum atom-type E-State: -NH2-+
	maxdNH	Maximum atom-type E-State: =NH
	maxssNH	Maximum atom-type E-State: -NH-
	maxaaNH	Maximum atom-type E-State: :NH:
	maxtN	Maximum atom-type E-State: #N
	maxsssNHp	Maximum atom-type E-State: >NH-+
	maxdsN	Maximum atom-type E-State: =N-
	maxaaN	Maximum atom-type E-State: :N:
	maxsssN	Maximum atom-type E-State: >N-
	maxddsN	Maximum atom-type E-State: -N<<
	maxaasN	Maximum atom-type E-State: :N:-
	maxssssNp	Maximum atom-type E-State: >N<+
	maxsOH	Maximum atom-type E-State: -OH
	maxdO	Maximum atom-type E-State: =O
	maxssO	Maximum atom-type E-State: -O-
	maxaaO	Maximum atom-type E-State: :O:
	maxaOm	Maximum atom-type E-State: :O-0.5
	maxsOm	Maximum atom-type E-State: -O-
	maxsF	Maximum atom-type E-State: -F
	maxsSiH3	Maximum atom-type E-State: -SiH3
	maxssSiH2	Maximum atom-type E-State: -SiH2-
	maxsssSiH	Maximum atom-type E-State: >SiH-
	maxssssSi	Maximum atom-type E-State: >Si<
	maxsPH2	Maximum atom-type E-State: -PH2
	maxssPH	Maximum atom-type E-State: -PH-
	maxsssP	Maximum atom-type E-State: >P-
	maxdsssP	Maximum atom-type E-State: ->P=
	maxddsP	Maximum atom-type E-State: -=P=
	maxsssssP	Maximum atom-type E-State: ->P<
	maxsSH	Maximum atom-type E-State: -SH
	maxdS	Maximum atom-type E-State: =S
	maxssS	Maximum atom-type E-State: -S-
	maxaaS	Maximum atom-type E-State: aSa
	maxdssS	Maximum atom-type E-State: >S=
	maxddssS	Maximum atom-type E-State: >S==
	maxssssssS	Maximum atom-type E-State: >S<<
	maxSm	Maximum atom-type E-State: -S-
	maxsCl	Maximum atom-type E-State: -Cl
	maxsGeH3	Maximum atom-type E-State: -GeH3
	maxssGeH2	Maximum atom-type E-State: -GeH2-
	maxsssGeH	Maximum atom-type E-State: >GeH-
	maxssssGe	Maximum atom-type E-State: >Ge<
	maxsAsH2	Maximum atom-type E-State: -AsH2
	maxssAsH	Maximum atom-type E-State: -AsH-
	maxsssAs	Maximum atom-type E-State: >As-
	maxdsssAs	Maximum atom-type E-State: ->As=
	maxddsAs	Maximum atom-type E-State: -=As=
	maxsssssAs	Maximum atom-type E-State: ->As<
	maxsSeH	Maximum atom-type E-State: -SeH
	maxdSe	Maximum atom-type E-State: =Se
	maxssSe	Maximum atom-type E-State: -Se-
	maxaaSe	Maximum atom-type E-State: aSea
	maxdssSe	Maximum atom-type E-State: >Se=
	maxssssssSe	Maximum atom-type E-State: >Se<<
	maxddssSe	Maximum atom-type E-State: -=Se=-
	maxsBr	Maximum atom-type E-State: -Br
	maxsSnH3	Maximum atom-type E-State: -SnH3
	maxssSnH2	Maximum atom-type E-State: -SnH2-
	maxsssSnH	Maximum atom-type E-State: >SnH-
	maxssssSn	Maximum atom-type E-State: >Sn<
	maxsI	Maximum atom-type E-State: -I
	maxsPbH3	Maximum atom-type E-State: -PbH3
	maxssPbH2	Maximum atom-type E-State: -PbH2-
	maxsssPbH	Maximum atom-type E-State: >PbH-
	maxssssPb	Maximum atom-type E-State: >Pb<
	sumI	Sum of the intrinsic state values I
	meanI	Mean intrinsic state values I
	hmax	Maximum H E-State
	gmax	Maximum E-State
	hmin	Minimum H E-State
	gmin	Minimum E-State
	LipoaffinityIndex	Lipoaffinity index
	MAXDN	Maximum negative intrinsic state difference in the molecule (related to the nucleophilicity of the molecule). Using deltaV = (Zv-maxBondedHydrogens) /(atomicNumber-Zv-1). Gramatica, P., Corradi, M., and Consonni, V. (2000). Modelling and prediction of soil sorption coefficients of non-ionic organic pesticides by molecular descriptors. Chemosphere 41, 763-777.
	MAXDP	Maximum positive intrinsic state difference in the molecule (related to the electrophilicity of the molecule). Using deltaV = (Zv-maxBondedHydrogens) /(atomicNumber-Zv-1). Gramatica, P., Corradi, M., and Consonni, V. (2000). Modelling and prediction of soil sorption coefficients of non-ionic organic pesticides by molecular descriptors. Chemosphere 41, 763-777.
	DELS	Sum of all atoms intrinsic state differences (measure of total charge transfer in the molecule). Using deltaV = (Zv-maxBondedHydrogens) /(atomicNumber-Zv-1). Gramatica, P., Corradi, M., and Consonni, V. (2000). Modelling and prediction of soil sorption coefficients of non-ionic organic pesticides by molecular descriptors. Chemosphere 41, 763-777.
	MAXDN2	Maximum negative intrinsic state difference in the molecule (related to the nucleophilicity of the molecule). Using deltaV = Zv-maxBondedHydrogens. Gramatica, P., Corradi, M., and Consonni, V. (2000). Modelling and prediction of soil sorption coefficients of non-ionic organic pesticides by molecular descriptors. Chemosphere 41, 763-777.
	MAXDP2	Maximum positive intrinsic state difference in the molecule (related to the electrophilicity of the molecule). Using deltaV = Zv-maxBondedHydrogens. Gramatica, P., Corradi, M., and Consonni, V. (2000). Modelling and prediction of soil sorption coefficients of non-ionic organic pesticides by molecular descriptors. Chemosphere 41, 763-777.
	DELS2	Sum of all atoms intrinsic state differences (measure of total charge transfer in the molecule). Using deltaV = Zv-maxBondedHydrogens. Gramatica, P., Corradi, M., and Consonni, V. (2000). Modelling and prediction of soil sorption coefficients of non-ionic organic pesticides by molecular descriptors. Chemosphere 41, 763-777.
ExtendedTopochemicalAtomDescriptor	ETA_Alpha	Sum of alpha values of all non-hydrogen vertices of a molecule
	ETA_AlphaP	Sum of alpha values of all non-hydrogen vertices of a molecule relative to molecular size
	ETA_dAlpha_A	A measure of count of non-hydrogen heteroatoms
	ETA_dAlpha_B	A measure of count of hydrogen bond acceptor atoms and/or polar surface area
	ETA_Epsilon_1	A measure of electronegative atom count
	ETA_Epsilon_2	A measure of electronegative atom count
	ETA_Epsilon_3	A measure of electronegative atom count
	ETA_Epsilon_4	A measure of electronegative atom count
	ETA_Epsilon_5	A measure of electronegative atom count
	ETA_dEpsilon_A	A measure of contribution of unsaturation and electronegative atom count
	ETA_dEpsilon_B	A measure of contribution of unsaturation
	ETA_dEpsilon_C	A measure of contribution of electronegativity
	ETA_dEpsilon_D	A measure of contribution of hydrogen bond donor atoms
	ETA_Psi_1	A measure of hydrogen bonding propensity of the molecules and/or polar surface area
	ETA_dPsi_A	A measure of hydrogen bonding propensity of the molecules
	ETA_dPsi_B	A measure of hydrogen bonding propensity of the molecules
	ETA_Shape_P	Shape index P
	ETA_Shape_Y	Shape index Y
	ETA_Shape_X	Shape index X
	ETA_Beta	A measure of electronic features of the molecule
	ETA_BetaP	A measure of electronic features of the molecule relative to molecular size
	ETA_Beta_s	A measure of electronegative atom count of the molecule
	ETA_BetaP_s	A measure of electronegative atom count of the molecule relative to molecular size
	ETA_Beta_ns	A measure of electron-richness of the molecule
	ETA_BetaP_ns	A measure of electron-richness of the molecule relative to molecular size
	ETA_dBeta	A measure of relative unsaturation content
	ETA_dBetaP	A measure of relative unsaturation content relative to molecular size
	ETA_Beta_ns_d	A measure of lone electrons entering into resonance
	ETA_BetaP_ns_d	A measure of lone electrons entering into resonance relative to molecular size
	ETA_Eta	Composite index Eta
	ETA_EtaP	Composite index Eta relative to molecular size
	ETA_Eta_R	Composite index Eta for reference alkane
	ETA_Eta_F	Functionality index EtaF
	ETA_EtaP_F	Functionality index EtaF relative to molecular size
	ETA_Eta_L	Local index Eta_local
	ETA_EtaP_L	Local index Eta_local relative to molecular size
	ETA_Eta_R_L	Local index Eta_local for reference alkane
	ETA_Eta_F_L	Local functionality contribution EtaF_local
	ETA_EtaP_F_L	Local functionality contribution EtaF_local relative to molecular size
	ETA_Eta_B	Branching index EtaB
	ETA_EtaP_B	Branching index EtaB relative to molecular size
	ETA_Eta_B_RC	Branching index EtaB (with ring correction)
	ETA_EtaP_B_RC	Branching index EtaB (with ring correction) relative to molecular size
FMFDescriptor	FMF	Complexity of a molecule
PaDELFragmentComplexityDescriptor	fragC	Complexity of a system
PaDELHBondAcceptorCountDescriptor	nHBAcc	Number of hydrogen bond acceptors (using CDK HBondAcceptorCountDescriptor algorithm)
	nHBAcc2	Number of hydrogen bond acceptors (any oxygen; any nitrogen where the formal charge of the nitrogen is non-positive (i.e. formal charge <= 0) except a non-aromatic nitrogen that is adjacent to an oxygen and aromatic ring, or an aromatic nitrogen with a hydrogen atom in a ring, or an aromatic nitrogen with 3 neighouring atoms in a ring, or a nitrogen with total bond order >=4; any fluorine)
	nHBAcc3	Number of hydrogen bond acceptors (any oxygen; any nitrogen where the formal charge of the nitrogen is non-positive (i.e. formal charge <= 0) except a non-aromatic nitrogen that is adjacent to an oxygen and aromatic ring, or an aromatic nitrogen with a hydrogen atom in a ring, or an aromatic nitrogen with 3 neighouring atoms in a ring, or a nitrogen with total bond order >=4, or a nitrogen in an …
	nHBAcc_Lipinski	Number of hydrogen bond acceptors (using Lipinski's definition: any nitrogen; any oxygen)
PaDELHBondDonorCountDescriptor	nHBDon	Number of hydrogen bond donors (using CDK HBondDonorCountDescriptor algorithm)
	nHBDon_Lipinski	Number of hydrogen bond donors (using Lipinski's definition: Any OH or NH. Each available hydrogen atom is counted as one hydrogen bond donor)
HybridizationRatioDescriptor	HybRatio	Fraction of sp3 carbons to sp2 carbons
InformationContentDescriptor	IC0	Information content index (neighborhood symmetry of 0-order)
	IC1	Information content index (neighborhood symmetry of 1-order)
	IC2	Information content index (neighborhood symmetry of 2-order)
	IC3	Information content index (neighborhood symmetry of 3-order)
	IC4	Information content index (neighborhood symmetry of 4-order)
	IC5	Information content index (neighborhood symmetry of 5-order)
	TIC0	Total information content index (neighborhood symmetry of 0-order)
	TIC1	Total information content index (neighborhood symmetry of 1-order)
	TIC2	Total information content index (neighborhood symmetry of 2-order)
	TIC3	Total information content index (neighborhood symmetry of 3-order)
	TIC4	Total information content index (neighborhood symmetry of 4-order)
	TIC5	Total information content index (neighborhood symmetry of 5-order)
	SIC0	Structural information content index (neighborhood symmetry of 0-order)
	SIC1	Structural information content index (neighborhood symmetry of 1-order)
	SIC2	Structural information content index (neighborhood symmetry of 2-order)
	SIC3	Structural information content index (neighborhood symmetry of 3-order)
	SIC4	Structural information content index (neighborhood symmetry of 4-order)
	SIC5	Structural information content index (neighborhood symmetry of 5-order)
	CIC0	Complementary information content index (neighborhood symmetry of 0-order)
	CIC1	Complementary information content index (neighborhood symmetry of 1-order)
	CIC2	Complementary information content index (neighborhood symmetry of 2-order)
	CIC3	Complementary information content index (neighborhood symmetry of 3-order)
	CIC4	Complementary information content index (neighborhood symmetry of 4-order)
	CIC5	Complementary information content index (neighborhood symmetry of 5-order)
	BIC0	Bond information content index (neighborhood symmetry of 0-order)
	BIC1	Bond information content index (neighborhood symmetry of 1-order)
	BIC2	Bond information content index (neighborhood symmetry of 2-order)
	BIC3	Bond information content index (neighborhood symmetry of 3-order)
	BIC4	Bond information content index (neighborhood symmetry of 4-order)
	BIC5	Bond information content index (neighborhood symmetry of 5-order)
	MIC0	Modified information content index (neighborhood symmetry of 0-order)
	MIC1	Modified information content index (neighborhood symmetry of 1-order)
	MIC2	Modified information content index (neighborhood symmetry of 2-order)
	MIC3	Modified information content index (neighborhood symmetry of 3-order)
	MIC4	Modified information content index (neighborhood symmetry of 4-order)
	MIC5	Modified information content index (neighborhood symmetry of 5-order)
	ZMIC0	Z-modified information content index (neighborhood symmetry of 0-order)
	ZMIC1	Z-modified information content index (neighborhood symmetry of 1-order)
	ZMIC2	Z-modified information content index (neighborhood symmetry of 2-order)
	ZMIC3	Z-modified information content index (neighborhood symmetry of 3-order)
	ZMIC4	Z-modified information content index (neighborhood symmetry of 4-order)
	ZMIC5	Z-modified information content index (neighborhood symmetry of 5-order)
KappaShapeIndicesDescriptor	Kier1	First kappa shape index
	Kier2	Second kappa shape index
	Kier3	Third kappa (κ) shape index
LargestChainDescriptor	nAtomLC	Number of atoms in the largest chain
LargestPiSystemDescriptor	nAtomP	Number of atoms in the largest pi system
LongestAliphaticChainDescriptor	nAtomLAC	Number of atoms in the longest aliphatic chain
MannholdLogPDescriptor	MLogP	Mannhold LogP
McGowanVolumeDescriptor	McGowan_Volume	McGowan characteristic volume
MDEDescriptor	MDEC-11	Molecular distance edge between all primary carbons
	MDEC-12	Molecular distance edge between all primary and secondary carbons
	MDEC-13	Molecular distance edge between all primary and tertiary carbons
	MDEC-14	Molecular distance edge between all primary and quaternary carbons
	MDEC-22	Molecular distance edge between all secondary carbons
	MDEC-23	Molecular distance edge between all secondary and tertiary carbons
	MDEC-24	Molecular distance edge between all secondary and quaternary carbons
	MDEC-33	Molecular distance edge between all tertiary carbons
	MDEC-34	Molecular distance edge between all tertiary and quaternary carbons
	MDEC-44	Molecular distance edge between all quaternary carbons
	MDEO-11	Molecular distance edge between all primary oxygens
	MDEO-12	Molecular distance edge between all primary and secondary oxygens
	MDEO-22	Molecular distance edge between all secondary oxygens
	MDEN-11	Molecular distance edge between all primary nitrogens
	MDEN-12	Molecular distance edge between all primary and secondary nitrogens
	MDEN-13	Molecular distance edge between all primary and tertiary niroqens
	MDEN-22	Molecular distance edge between all secondary nitroqens
	MDEN-23	Molecular distance edge between all secondary and tertiary nitrogens
	MDEN-33	Molecular distance edge between all tertiary nitrogens
MLFERDescriptor	MLFER_A	Overall or summation solute hydrogen bond acidity
	MLFER_BH	Overall or summation solute hydrogen bond basicity
	MLFER_BO	Overall or summation solute hydrogen bond basicity
	MLFER_S	Combined dipolarity/polarizability
	MLFER_E	Excessive molar refraction
	MLFER_L	Solute gas-hexadecane partition coefficient
PathCountDescriptor	MPC2	Molecular path count of order 2
	MPC3	Molecular path count of order 3
	MPC4	Molecular path count of order 4
	MPC5	Molecular path count of order 5
	MPC6	Molecular path count of order 6
	MPC7	Molecular path count of order 7
	MPC8	Molecular path count of order 8
	MPC9	Molecular path count of order 9
	MPC10	Molecular path count of order 10
	TPC	Total path count (up to order 10)
	piPC1	Conventional bond order ID number of order 1 (ln(1+x)
	piPC2	Conventional bond order ID number of order 2 (ln(1+x)
	piPC3	Conventional bond order ID number of order 3 (ln(1+x)
	piPC4	Conventional bond order ID number of order 4 (ln(1+x)
	piPC5	Conventional bond order ID number of order 5 (ln(1+x)
	piPC6	Conventional bond order ID number of order 6 (ln(1+x)
	piPC7	Conventional bond order ID number of order 7 (ln(1+x)
	piPC8	Conventional bond order ID number of order 8 (ln(1+x)
	piPC9	Conventional bond order ID number of order 9 (ln(1+x)
	piPC10	Conventional bond order ID number of order 10 (ln(1+x)
	TpiPC	Total conventional bond order (up to order 10) (ln(1+x))
	R_TpiPCTPC	Ratio of total conventional bond order (up to order 10) with total path count (up to order 10)
PetitjeanNumberDescriptor	PetitjeanNumber	Petitjean number
RingCountDescriptor	nRing	Number of rings
	n3Ring	Number of 3-membered rings
	n4Ring	Number of 4-membered rings
	n5Ring	Number of 5-membered rings
	n6Ring	Number of 6-membered rings
	n7Ring	Number of 7-membered rings
	n8Ring	Number of 8-membered rings
	n9Ring	Number of 9-membered rings
	n10Ring	Number of 10-membered rings
	n11Ring	Number of 11-membered rings
	n12Ring	Number of 12-membered rings
	nG12Ring	Number of >12-membered rings
	nFRing	Number of fused rings
	nF4Ring	Number of 4-membered fused rings
	nF5Ring	Number of 5-membered fused rings
	nF6Ring	Number of 6-membered fused rings
	nF7Ring	Number of 7-membered fused rings
	nF8Ring	Number of 8-membered fused rings
	nF9Ring	Number of 9-membered fused rings
	nF10Ring	Number of 10-membered fused rings
	nF11Ring	Number of 11-membered fused rings
	nF12Ring	Number of 12-membered fused rings
	nFG12Ring	Number of >12-membered fused rings
	nTRing	Number of rings (includes counts from fused rings)
	nT4Ring	Number of 4-membered rings (includes counts from fused rings)
	nT5Ring	Number of 5-membered rings (includes counts from fused rings)
	nT6Ring	Number of 6-membered rings (includes counts from fused rings)
	nT7Ring	Number of 7-membered rings (includes counts from fused rings)
	nT8Ring	Number of 8-membered rings (includes counts from fused rings)
	nT9Ring	Number of 9-membered rings (includes counts from fused rings)
	nT10Ring	Number of 10-membered rings (includes counts from fused rings)
	nT11Ring	Number of 11-membered rings (includes counts from fused rings)
	nT12Ring	Number of 12-membered rings (includes counts from fused rings)
	nTG12Ring	Number of >12-membered rings (includes counts from fused rings)
	nHeteroRing	Number of rings containing heteroatoms (N, O, P, S, or halogens)
	n3HeteroRing	Number of 3-membered rings containing heteroatoms (N, O, P, S, or halogens)
	n4HeteroRing	Number of 4-membered rings containing heteroatoms (N, O, P, S, or halogens)
	n5HeteroRing	Number of 5-membered rings containing heteroatoms (N, O, P, S, or halogens)
	n6HeteroRing	Number of 6-membered rings containing heteroatoms (N, O, P, S, or halogens)
	n7HeteroRing	Number of 7-membered rings containing heteroatoms (N, O, P, S, or halogens)
	n8HeteroRing	Number of 8-membered rings containing heteroatoms (N, O, P, S, or halogens)
	n9HeteroRing	Number of 9-membered rings containing heteroatoms (N, O, P, S, or halogens)
	n10HeteroRing	Number of 10-membered rings containing heteroatoms (N, O, P, S, or halogens)
	n11HeteroRing	Number of 11-membered rings containing heteroatoms (N, O, P, S, or halogens)
	n12HeteroRing	Number of 12-membered rings containing heteroatoms (N, O, P, S, or halogens)
	nG12HeteroRing	Number of >12-membered rings containing heteroatoms (N, O, P, S, or halogens)
	nFHeteroRing	Number of fused rings containing heteroatoms (N, O, P, S, or halogens)
	nF4HeteroRing	Number of 4-membered fused rings containing heteroatoms (N, O, P, S, or halogens)
	nF5HeteroRing	Number of 5-membered fused rings containing heteroatoms (N, O, P, S, or halogens)
	nF6HeteroRing	Number of 6-membered fused rings containing heteroatoms (N, O, P, S, or halogens)
	nF7HeteroRing	Number of 7-membered fused rings containing heteroatoms (N, O, P, S, or halogens)
	nF8HeteroRing	Number of 8-membered fused rings containing heteroatoms (N, O, P, S, or halogens)
	nF9HeteroRing	Number of 9-membered fused rings containing heteroatoms (N, O, P, S, or halogens)
	nF10HeteroRing	Number of 10-membered fused rings containing heteroatoms (N, O, P, S, or halogens)
	nF11HeteroRing	Number of 11-membered fused rings containing heteroatoms (N, O, P, S, or halogens)
	nF12HeteroRing	Number of 12-membered fused rings containing heteroatoms (N, O, P, S, or halogens)
	nFG12HeteroRing	Number of >12-membered fused rings containing heteroatoms (N, O, P, S, or halogens)
	nTHeteroRing	Number of rings (includes counts from fused rings) containing heteroatoms (N, O, P, S, or halogens)
	nT4HeteroRing	Number of 4-membered rings (includes counts from fused rings) containing heteroatoms (N, O, P, S, or halogens)
	nT5HeteroRing	Number of 5-membered rings (includes counts from fused rings) containing heteroatoms (N, O, P, S, or halogens)
	nT6HeteroRing	Number of 6-membered rings (includes counts from fused rings) containing heteroatoms (N, O, P, S, or halogens)
	nT7HeteroRing	Number of 7-membered rings (includes counts from fused rings) containing heteroatoms (N, O, P, S, or halogens)
	nT8HeteroRing	Number of 8-membered rings (includes counts from fused rings) containing heteroatoms (N, O, P, S, or halogens)
	nT9HeteroRing	Number of 9-membered rings (includes counts from fused rings) containing heteroatoms (N, O, P, S, or halogens)
	nT10HeteroRing	Number of 10-membered rings (includes counts from fused rings) containing heteroatoms (N, O, P, S, or halogens)
	nT11HeteroRing	Number of 11-membered rings (includes counts from fused rings) containing heteroatoms (N, O, P, S, or halogens)
	nT12HeteroRing	Number of 12-membered rings (includes counts from fused rings) containing heteroatoms (N, O, P, S, or halogens)
	nTG12HeteroRing	Number of >12-membered rings (includes counts from fused rings) containing heteroatoms (N, O, P, S, or halogens)
PaDELRotatableBondsCountDescriptor	nRotB	Number of rotatable bonds, excluding terminal bonds
	RotBFrac	Fraction of rotatable bonds, excluding terminal bonds
	nRotBt	Number of rotatable bonds, including terminal bonds
	RotBtFrac	Fraction of rotatable bonds, including terminal bonds
RuleOfFiveDescriptor	LipinskiFailures	Number failures of the Lipinski's Rule Of 5
TopologicalDescriptor	topoRadius	Topological radius (minimum atom eccentricity)
	topoDiameter	Topological diameter (maximum atom eccentricity)
	topoShape	Petitjean topological shape index
TopologicalChargeDescriptor	GGI1	Topological charge index of order 1
	GGI2	Topological charge index of order 2
	GGI3	Topological charge index of order 3
	GGI4	Topological charge index of order 4
	GGI5	Topological charge index of order 5
	GGI6	Topological charge index of order 6
	GGI7	Topological charge index of order 7
	GGI8	Topological charge index of order 8
	GGI9	Topological charge index of order 9
	GGI10	Topological charge index of order 10
	JGI1	Mean topological charge index of order 1
	JGI2	Mean topological charge index of order 2
	JGI3	Mean topological charge index of order 3
	JGI4	Mean topological charge index of order 4
	JGI5	Mean topological charge index of order 5
	JGI6	Mean topological charge index of order 6
	JGI7	Mean topological charge index of order 7
	JGI8	Mean topological charge index of order 8
	JGI9	Mean topological charge index of order 9
	JGI10	Mean topological charge index of order 10
	JGT	Global topological charge index
TopologicalDistanceMatrixDescriptor	SpMax_D	Leading eigenvalue from topological distance matrix
	SpDiam_D	Spectral diameter from topological distance matrix
	SpAD_D	Spectral absolute deviation from topological distance matrix
	SpMAD_D	Spectral mean absolute deviation from topological distance matrix
	EE_D	Estrada-like index from topological distance matrix
	VE1_D	Coefficient sum of the last eigenvector from topological distance matrix
	VE2_D	Average coefficient sum of the last eigenvector from topological distance matrix
	VE3_D	Logarithmic coefficient sum of the last eigenvector from topological distance matrix
	VR1_D	Randic-like eigenvector-based index from topological distance matrix
	VR2_D	Normalized Randic-like eigenvector-based index from topological distance matrix
	VR3_D	Logarithmic Randic-like eigenvector-based index from topological distance matrix
TPSADescriptor	TopoPSA	Topological polar surface area
VABCDescriptor	VABC	Van der Waals volume calculated using the method proposed in [Zhao, Yuan H. and Abraham, Michael H. and Zissimos, Andreas M., Fast Calculation of van der Waals Volume as a Sum of Atomic and Bond Contributions and Its Application to Drug Compounds, The Journal of Organic Chemistry, 2003, 68:7368-7373]
VAdjMaDescriptor	vAdjMat	Vertex adjacency information (magnitude)
WalkCountDescriptor	MWC2	Molecular walk count of order 2 (ln(1+x)
	MWC3	Molecular walk count of order 3 (ln(1+x)
	MWC4	Molecular walk count of order 4 (ln(1+x)
	MWC5	Molecular walk count of order 5 (ln(1+x)
	MWC6	Molecular walk count of order 6 (ln(1+x)
	MWC7	Molecular walk count of order 7 (ln(1+x)
	MWC8	Molecular walk count of order 8 (ln(1+x)
	MWC9	Molecular walk count of order 9 (ln(1+x)
	MWC10	Molecular walk count of order 10 (ln(1+x)
	TWC	Total walk count (up to order 10)
	SRW2	Self-returning walk count of order 2 (ln(1+x)
	SRW3	Self-returning walk count of order 3 (ln(1+x)
	SRW4	Self-returning walk count of order 4 (ln(1+x)
	SRW5	Self-returning walk count of order 5 (ln(1+x)
	SRW6	Self-returning walk count of order 6 (ln(1+x)
	SRW7	Self-returning walk count of order 7 (ln(1+x)
	SRW8	Self-returning walk count of order 8 (ln(1+x)
	SRW9	Self-returning walk count of order 9 (ln(1+x)
	SRW10	Self-returning walk count of order 10 (ln(1+x)
	TSRW	Total self-return walk count (up to order 10) (ln(1+x))
PaDELWeightDescriptor	MW	Molecular weight
	AMW	Average molecular weight (Molecular weight / Total number of atoms)
PaDELWeightedPathDescriptor	WTPT-1	Molecular ID
	WTPT-2	Molecular ID / number of atoms
	WTPT-3	Sum of path lengths starting from heteroatoms
	WTPT-4	Sum of path lengths starting from oxygens
	WTPT-5	Sum of path lengths starting from nitrogens
WienerNumbersDescriptor	WPATH	Weiner path number
	WPOL	Weiner polarity number
XLogPDescriptor	XLogP	XLogP
ZagrebIndexDescriptor	Zagreb	Sum of the squares of atom degree over all heavy atoms i
